# Supplementary material
Source: MDPI journal article supplement (https://www.mdpi.com/1424-8247/14/5/412)
Supplement: s1 [file s1]

## Supplementary Information

# New acyl derivatives of 3-aminofurazanes and their antiplasmodial activities

Theresa Hermann <sup>1</sup>, Patrick Hochegger <sup>1\*</sup>, Johanna Dolensky <sup>1</sup>, Werner Seebacher <sup>1</sup>, Robert Saf <sup>2</sup>, Marcel Kaiser <sup>3</sup>, Pascal Mäser <sup>3</sup> and Robert Weis <sup>1</sup>

<sup>1</sup> Institute of Pharmaceutical Sciences, Pharmaceutical Chemistry, University of Graz, Schubertstraße 1, A-8010 Graz, Austria; [theresa.hermann@uni-graz.at](mailto:theresa.hermann@uni-graz.at); [patrick.hochegger@uni-graz.at](mailto:patrick.hochegger@uni-graz.at); [we.seebacher@uni-graz.at](mailto:we.seebacher@uni-graz.at); [robert.weis@uni-graz.at](mailto:robert.weis@uni-graz.at)

<sup>2</sup> Institute for Chemistry and Technology of Materials (ICTM), Graz University of Technology, Stremayrgasse 9, A-8010 Graz, Austria; [robert.saf@tugraz.at](mailto:robert.saf@tugraz.at)

<sup>3</sup> Swiss Tropical and Public Health Institute, Socinstrasse 57, CH-4002 Basel, Switzerland; [marcel.kaiser@swisstph.ch](mailto:marcel.kaiser@swisstph.ch); [pascal.maeser@swisstph.ch](mailto:pascal.maeser@swisstph.ch)

\* Correspondence: [patrick.hochegger@uni-graz.at](mailto:patrick.hochegger@uni-graz.at); Tel.: +43-316-380-5379; fax: +43-316-380-9846

---

**NMR spectra data of compounds 6, 2, 8, 9, 20, 1, 10-17, 26-29, 31, 32, 34, 35 and 39**

**Figure S1.**  $^1\text{H}$  NMR at 400 MHz and  $^{13}\text{C}$  NMR at 100 MHz spectra for compound **6**

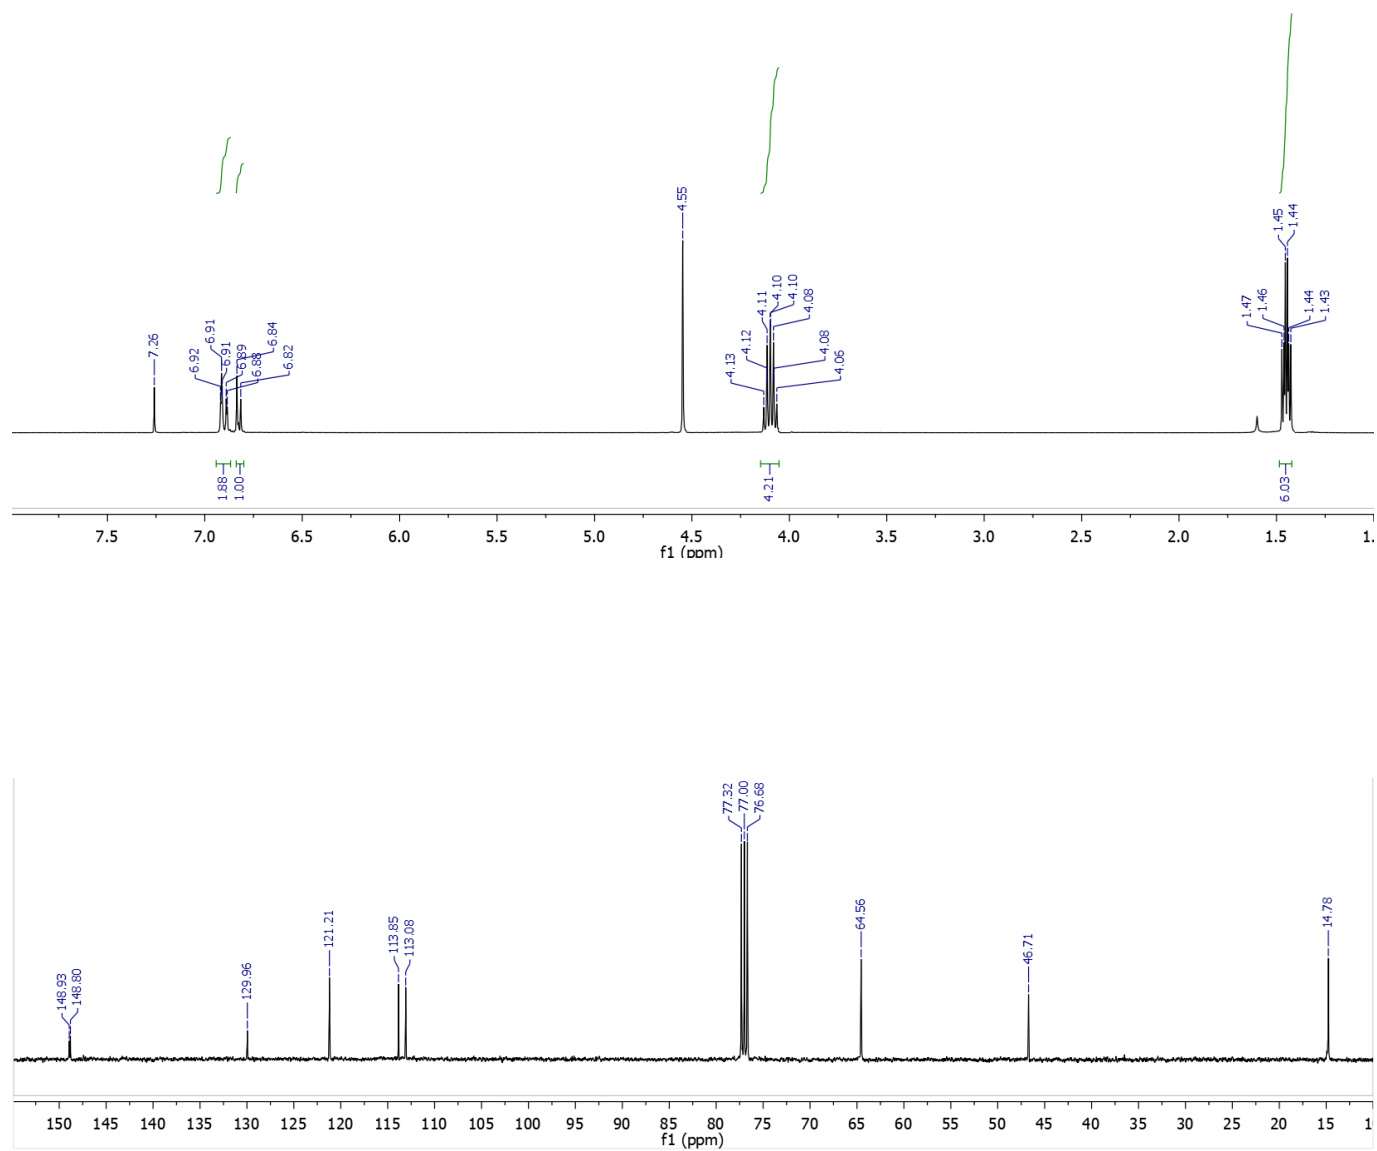

Figure S2. <sup>1</sup>H NMR at 400 MHz and <sup>13</sup>C NMR at 100 MHz spectra for compound 2

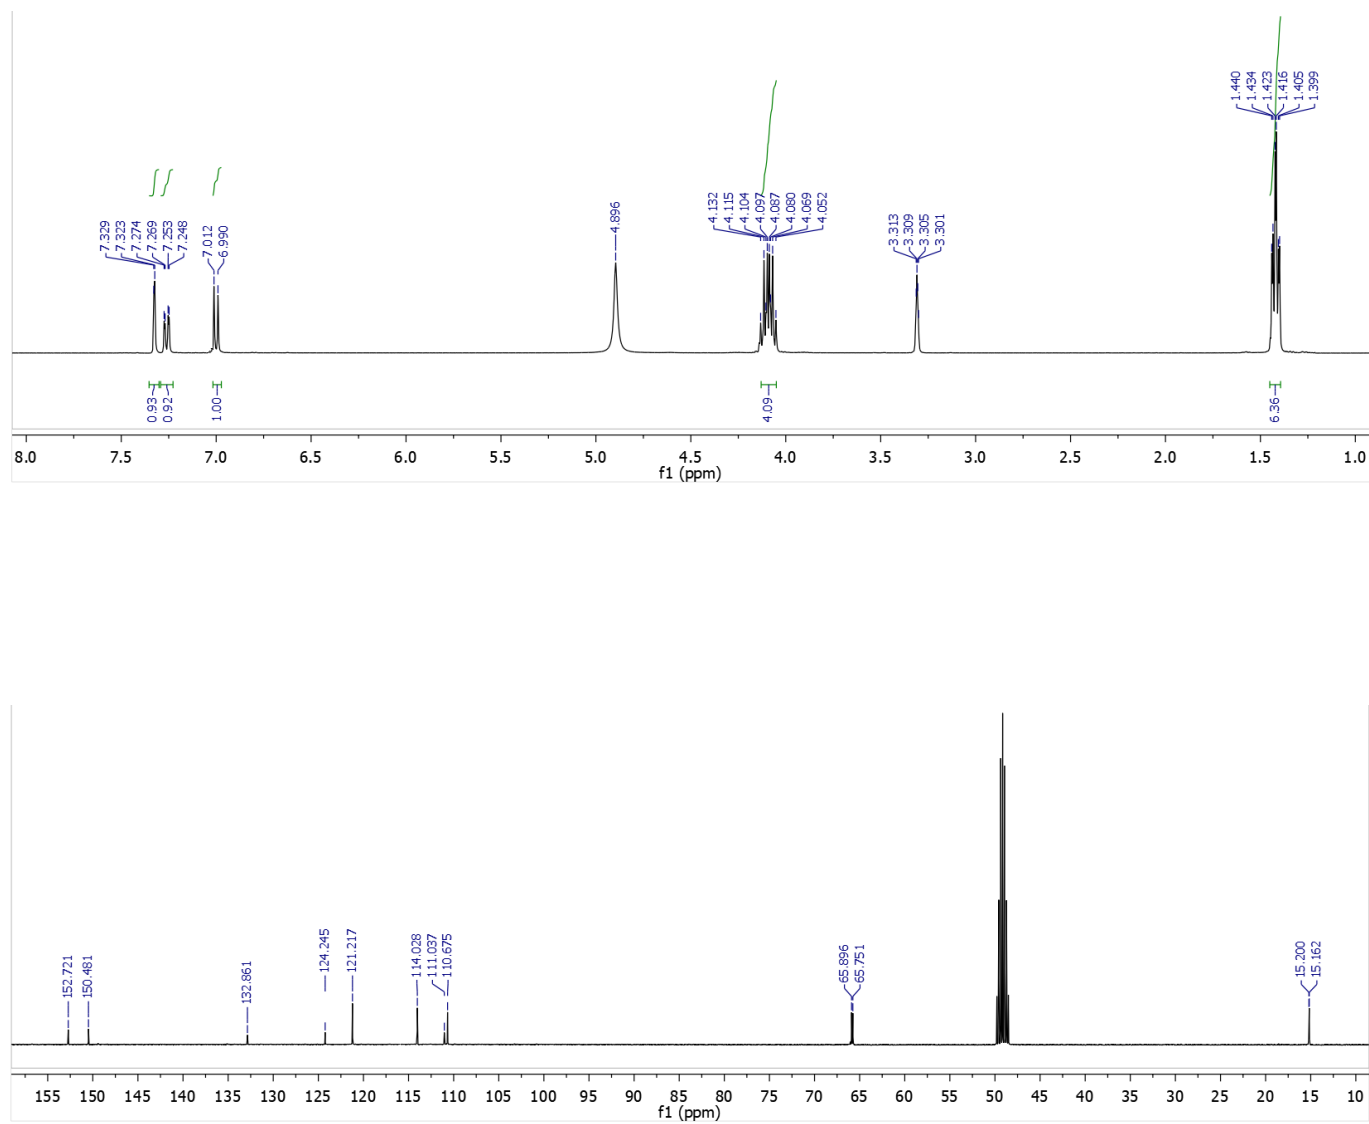

Figure S3. <sup>1</sup>H NMR at 400 MHz and <sup>13</sup>C NMR at 100 MHz spectra for compound 8

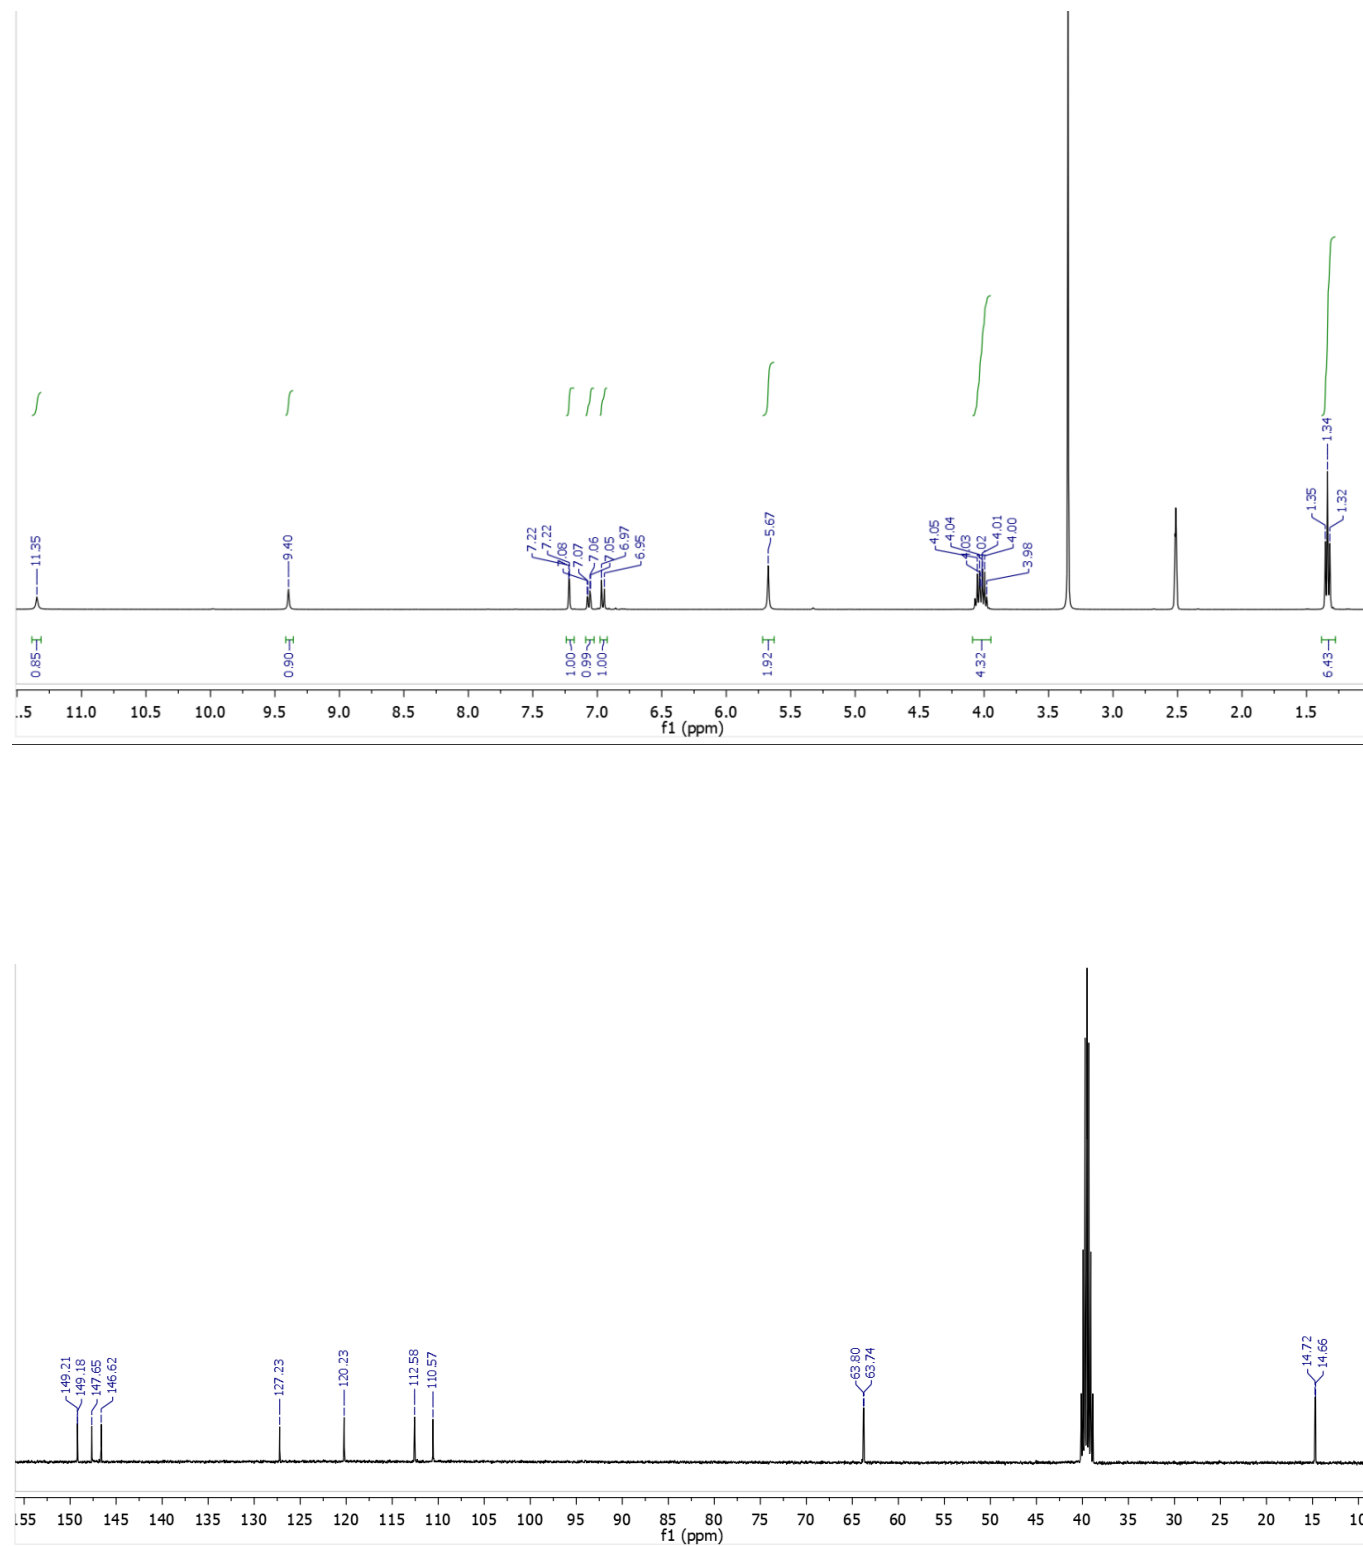

**Figure S4.**  $^1\text{H}$  NMR at 400 MHz and  $^{13}\text{C}$  NMR at 100 MHz spectra for compound **9**

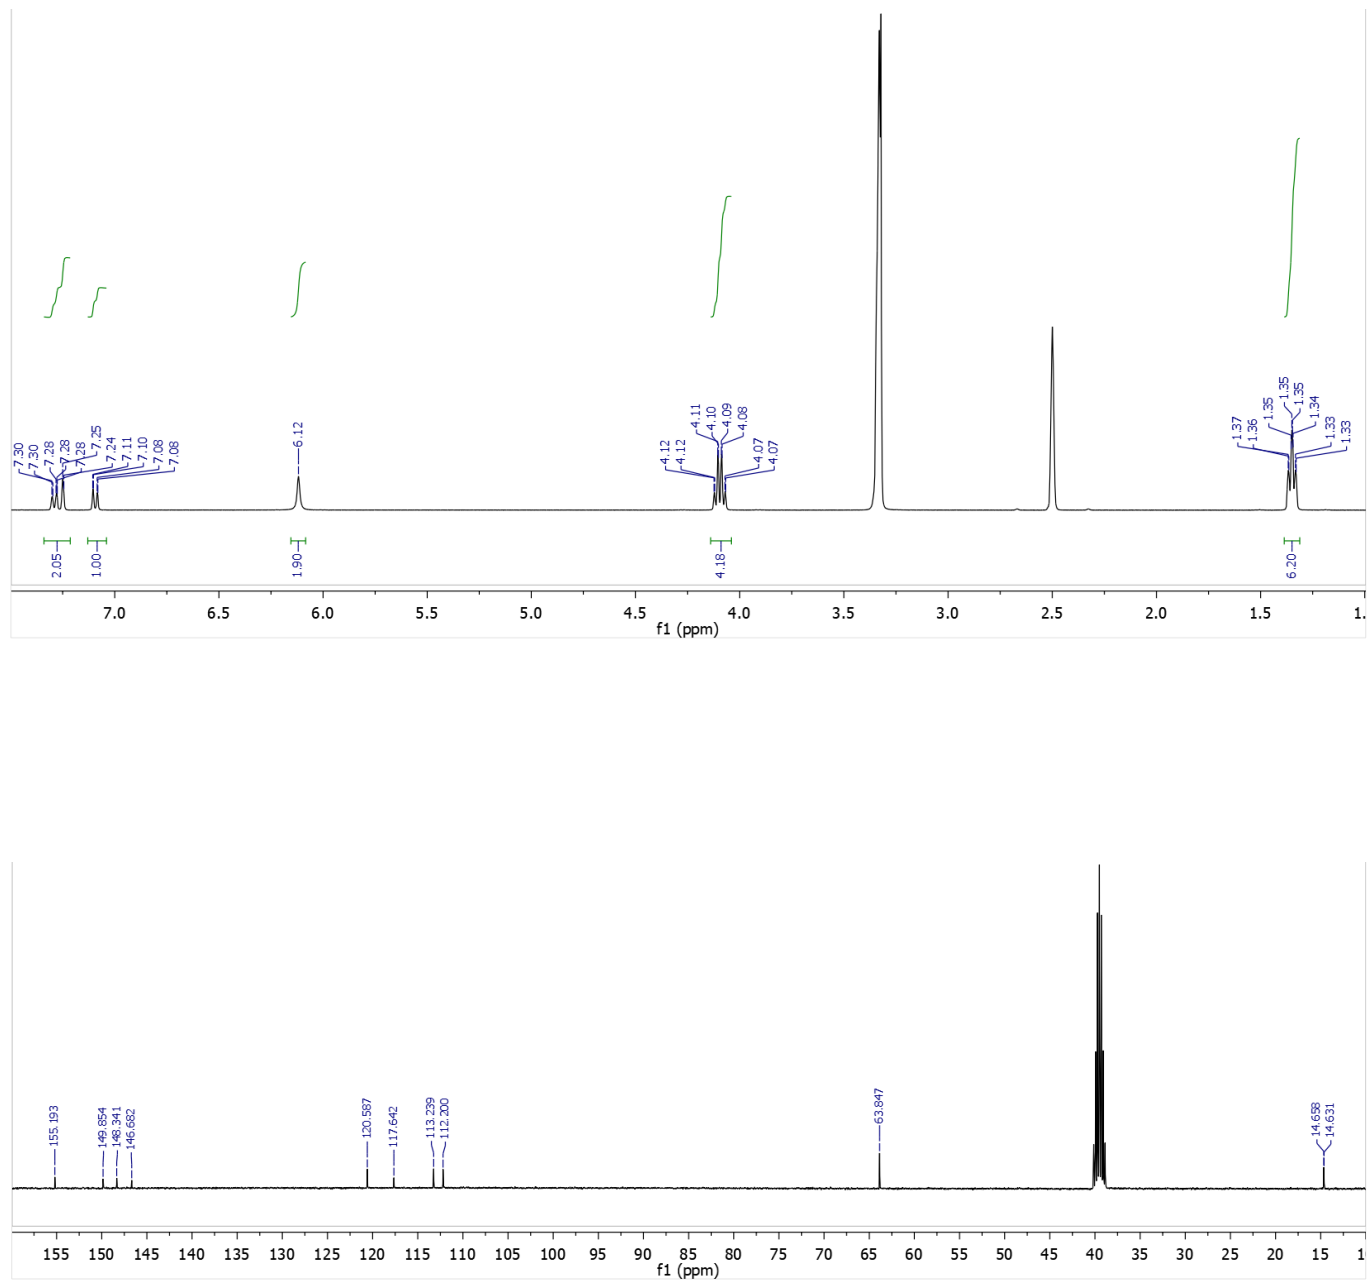

**Figure S5.**  $^1\text{H}$  NMR at 400 MHz and  $^{13}\text{C}$  NMR at 100 MHz spectra for compound **20**

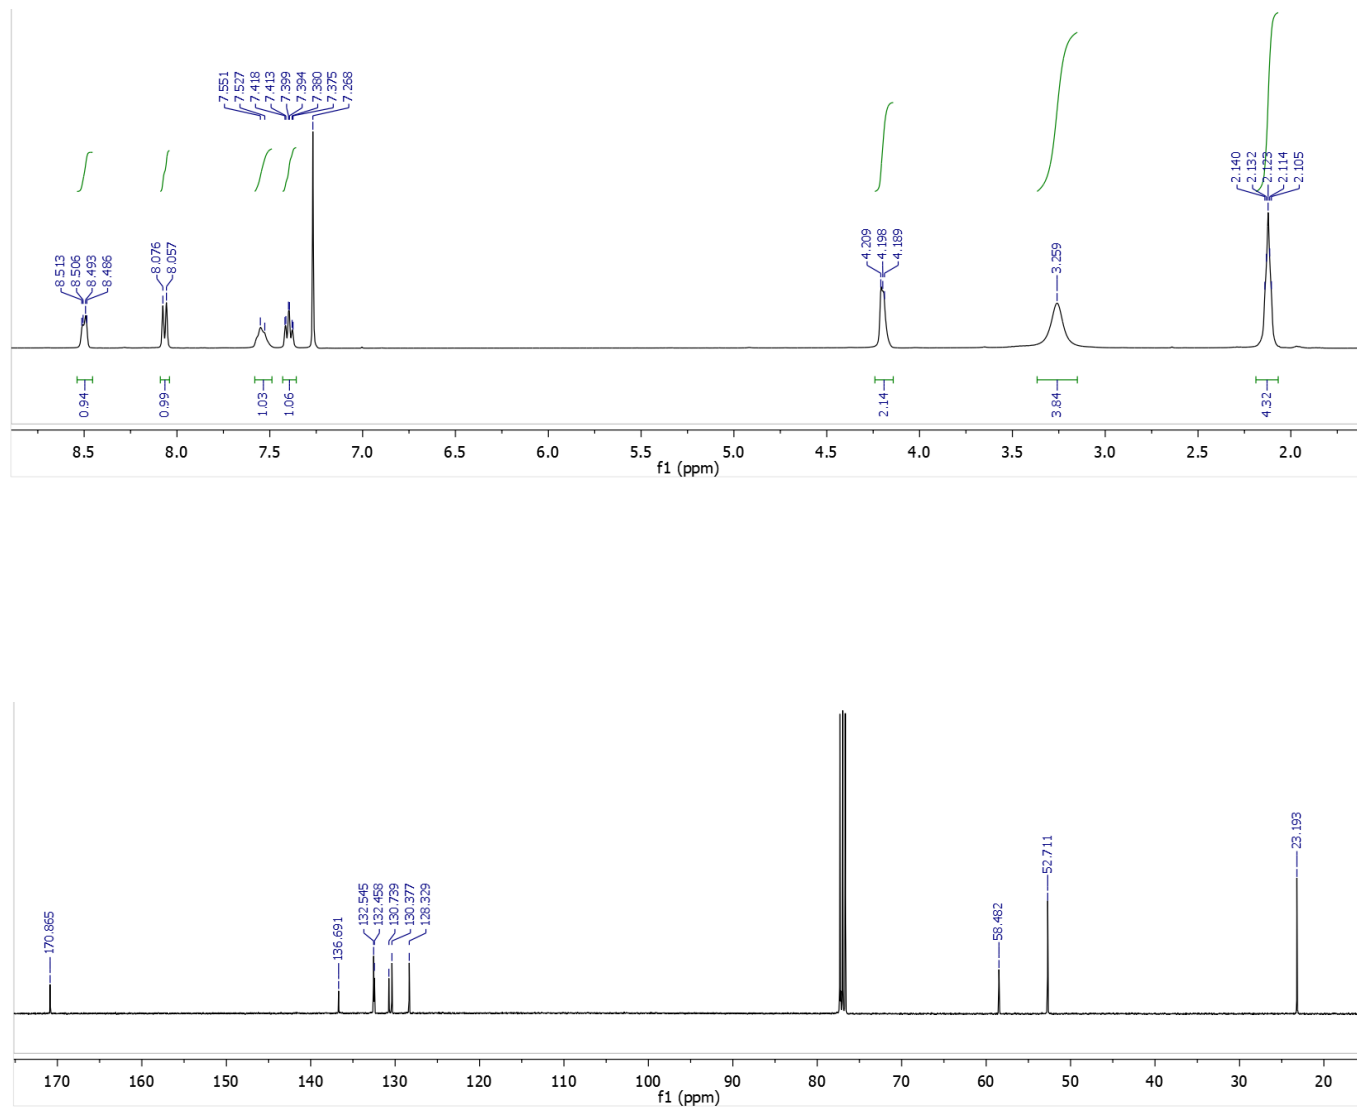

Figure S6. <sup>1</sup>H NMR at 400 MHz and <sup>13</sup>C NMR at 100 MHz spectra for compound 1

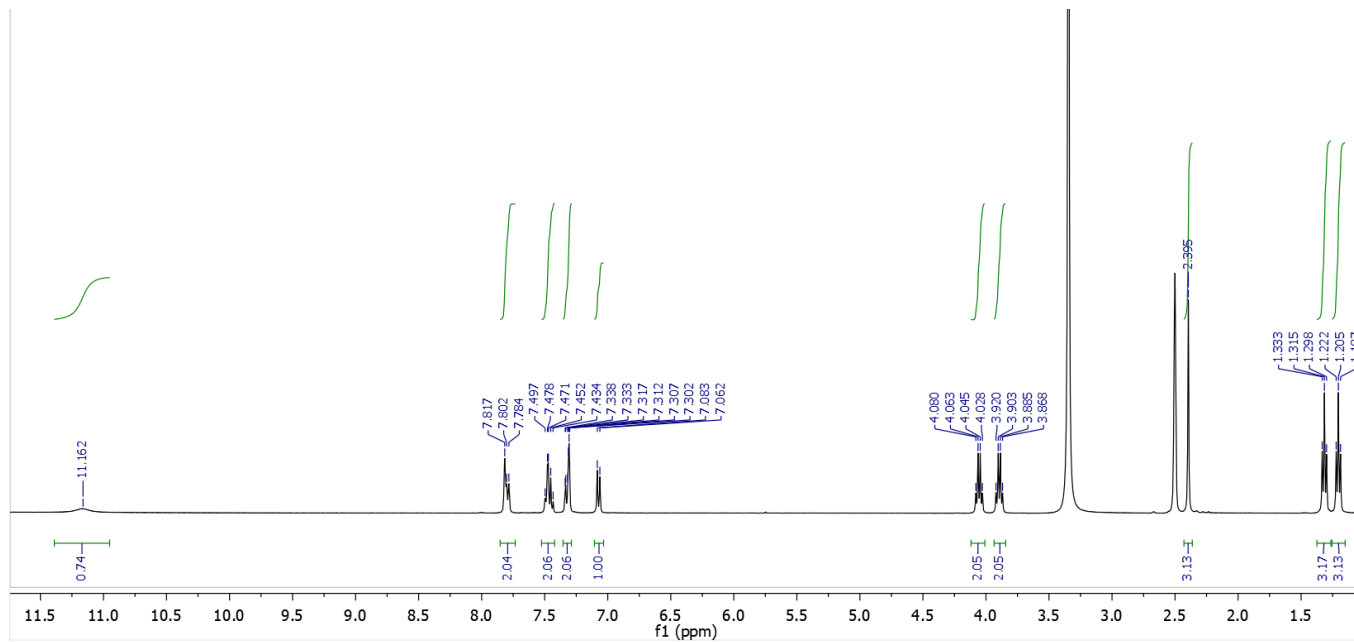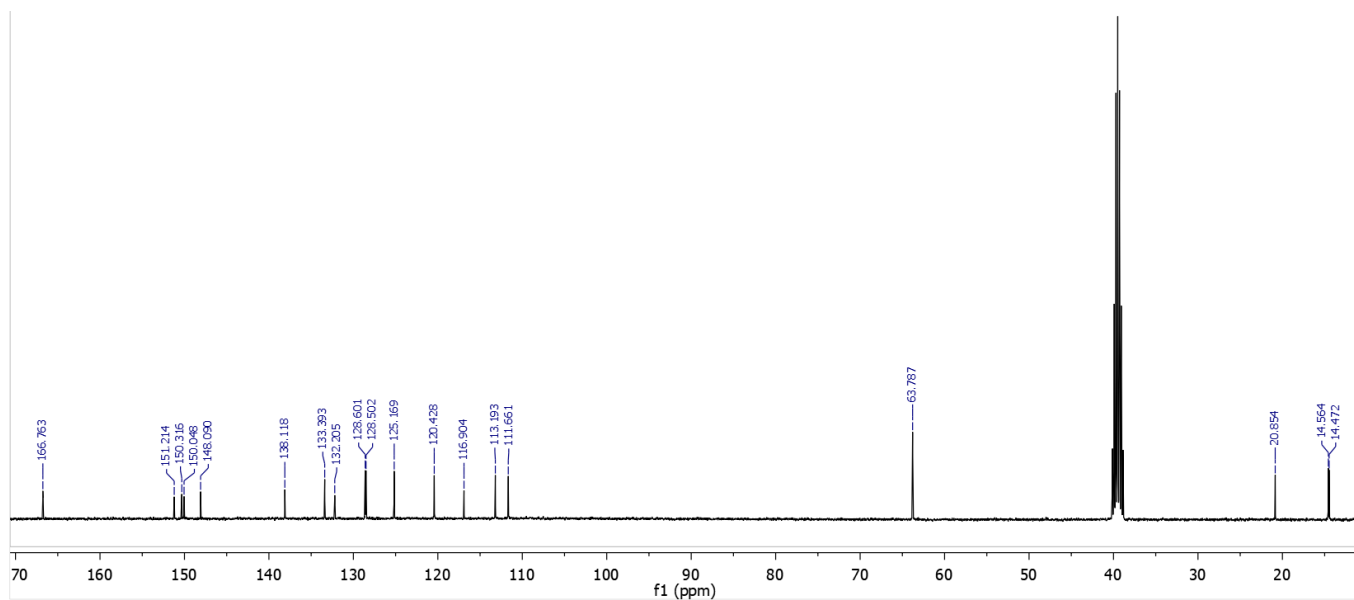

Figure S7. <sup>1</sup>H NMR at 400 MHz and <sup>13</sup>C NMR at 100 MHz spectra for compound 10

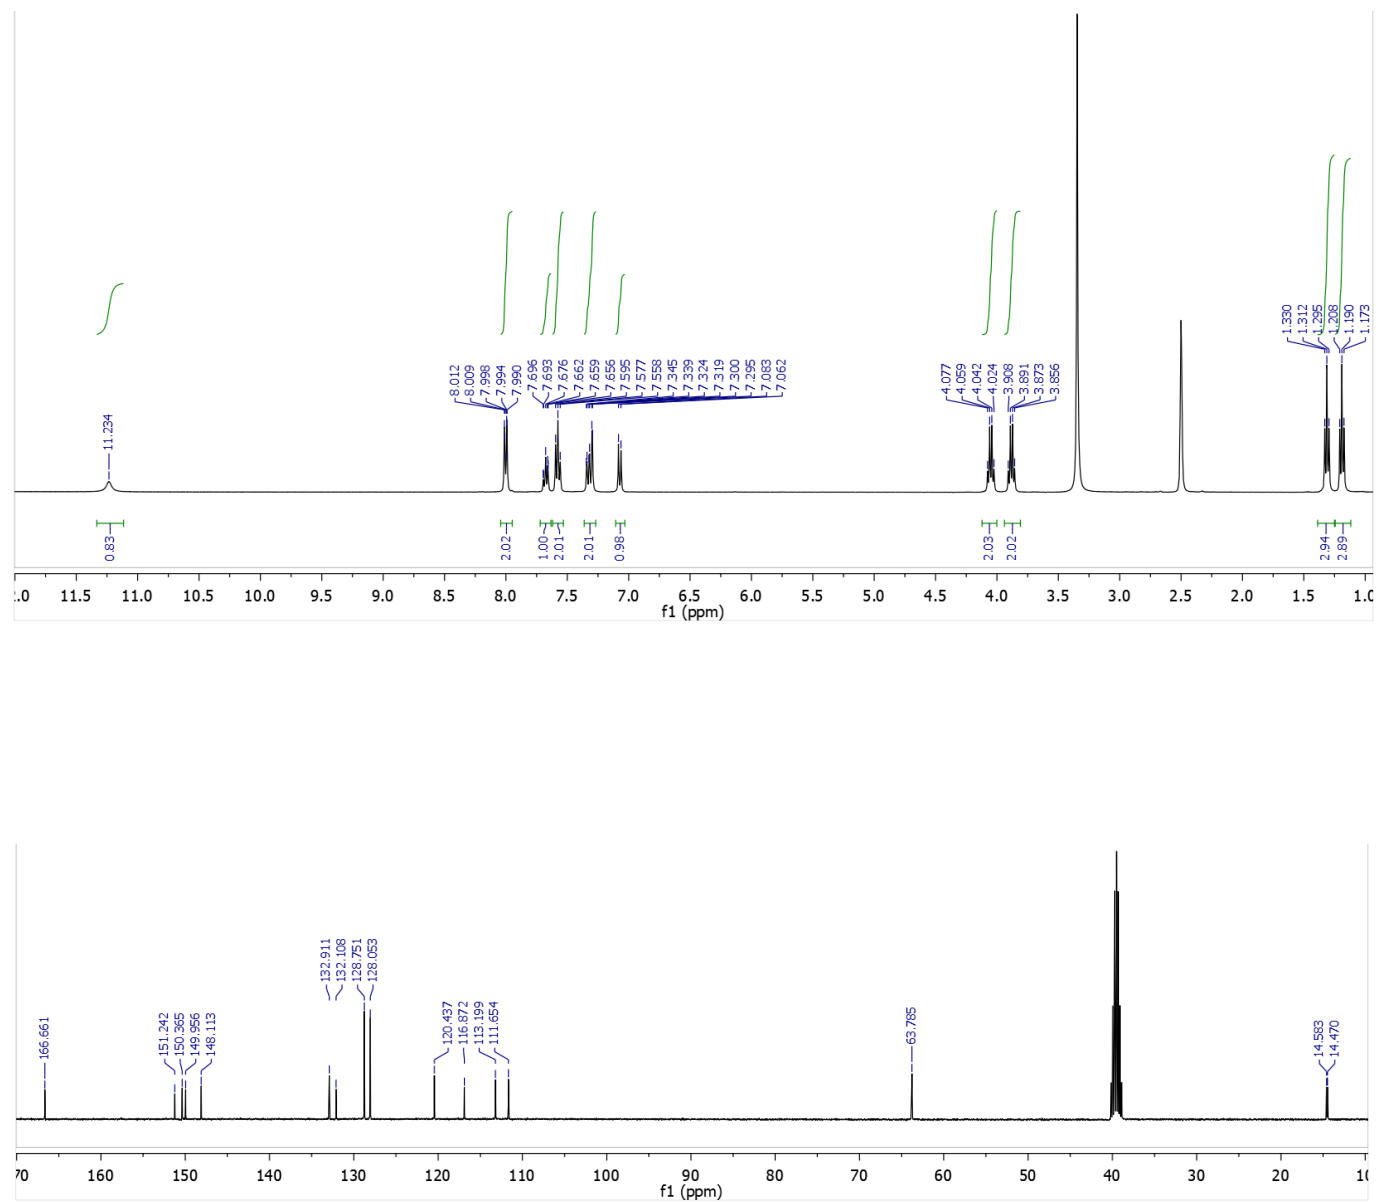



Figure S8. <sup>1</sup>H NMR at 400 MHz and <sup>13</sup>C NMR at 100 MHz spectra for compound 11

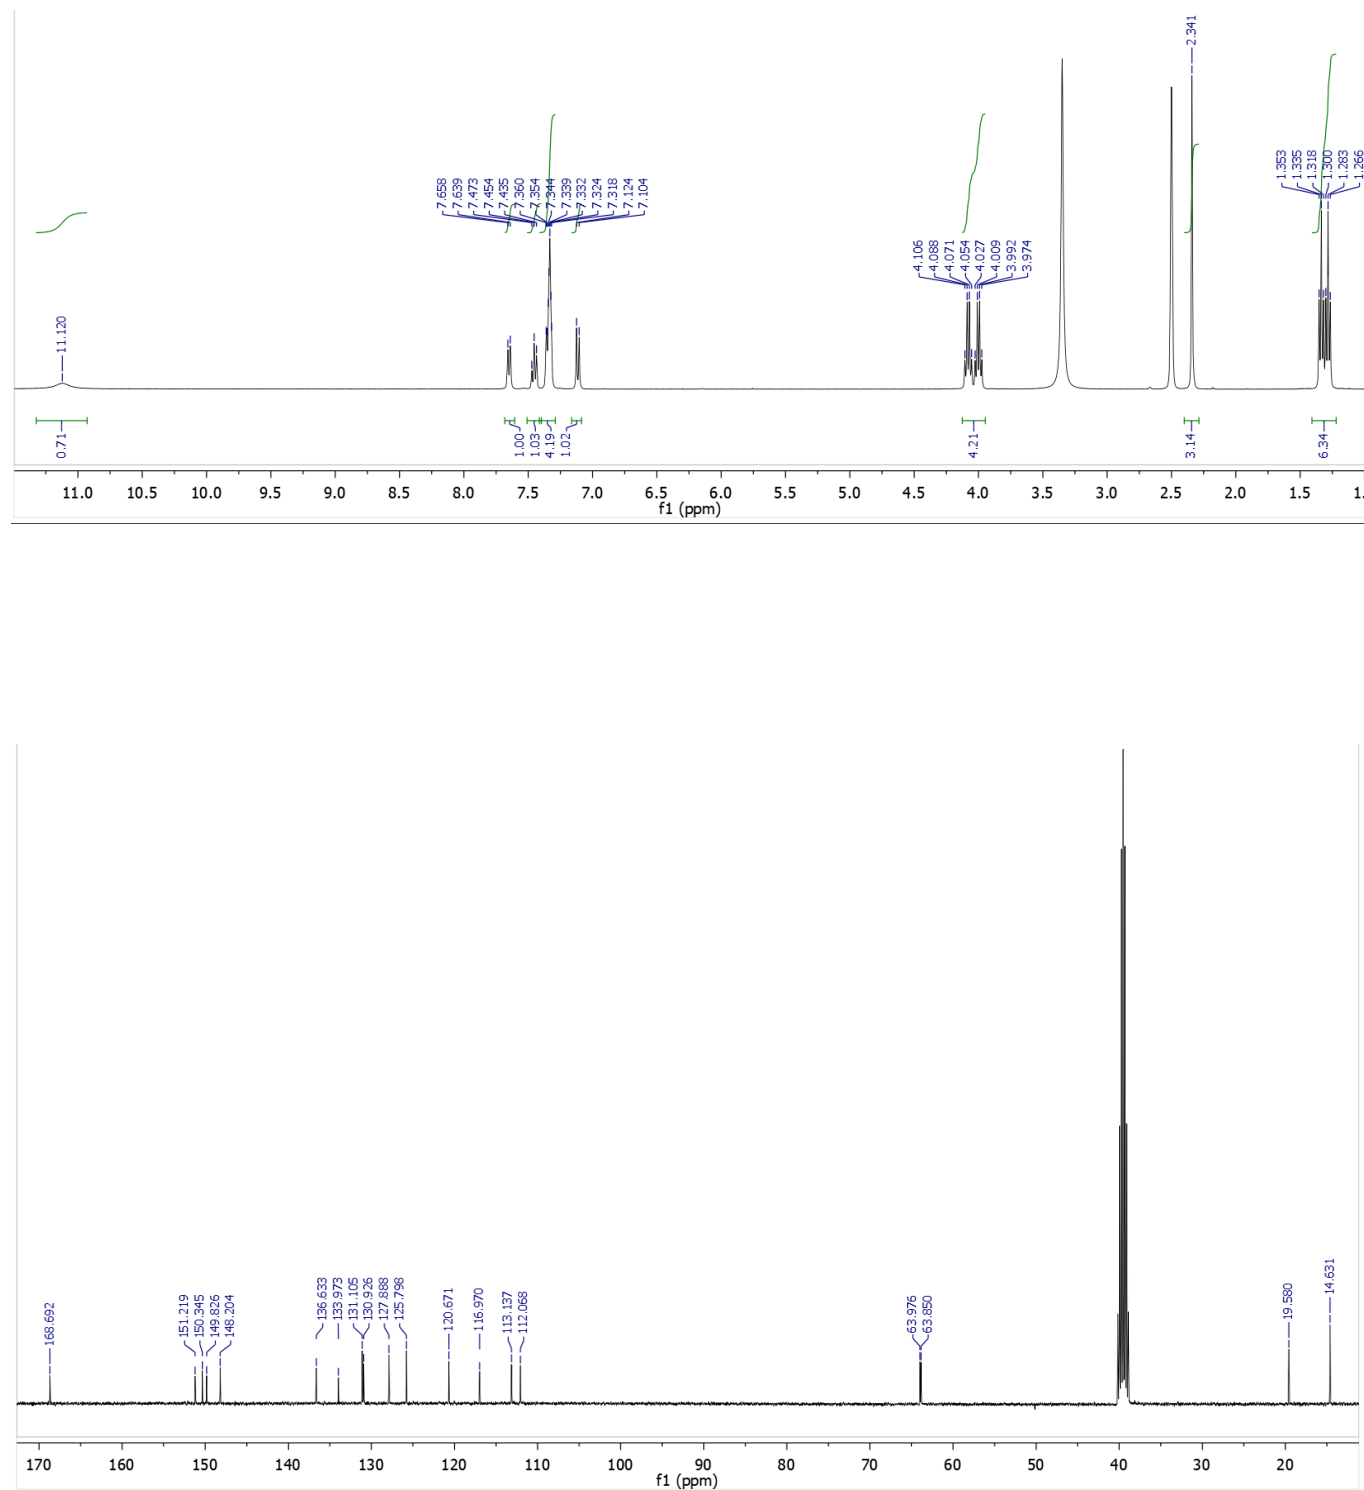

Figure S9. <sup>1</sup>H NMR at 400 MHz and <sup>13</sup>C NMR at 100 MHz spectra for compound 12

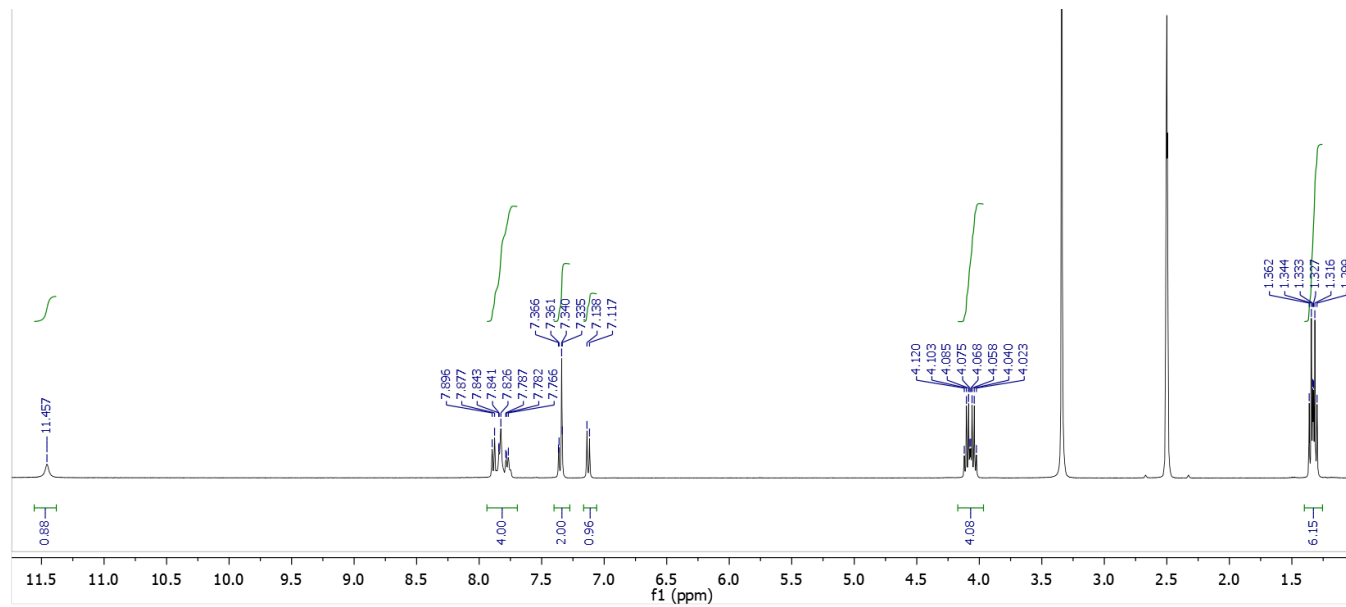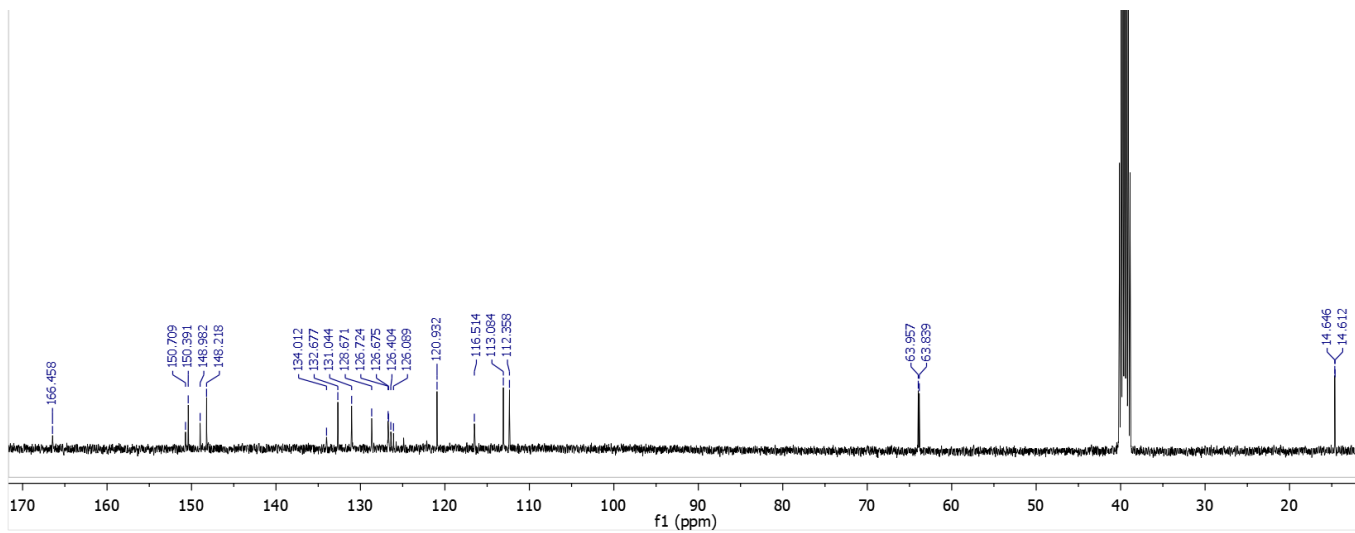

Figure S10. <sup>1</sup>H NMR at 400 MHz and <sup>13</sup>C NMR at 100 MHz spectra for compound 13

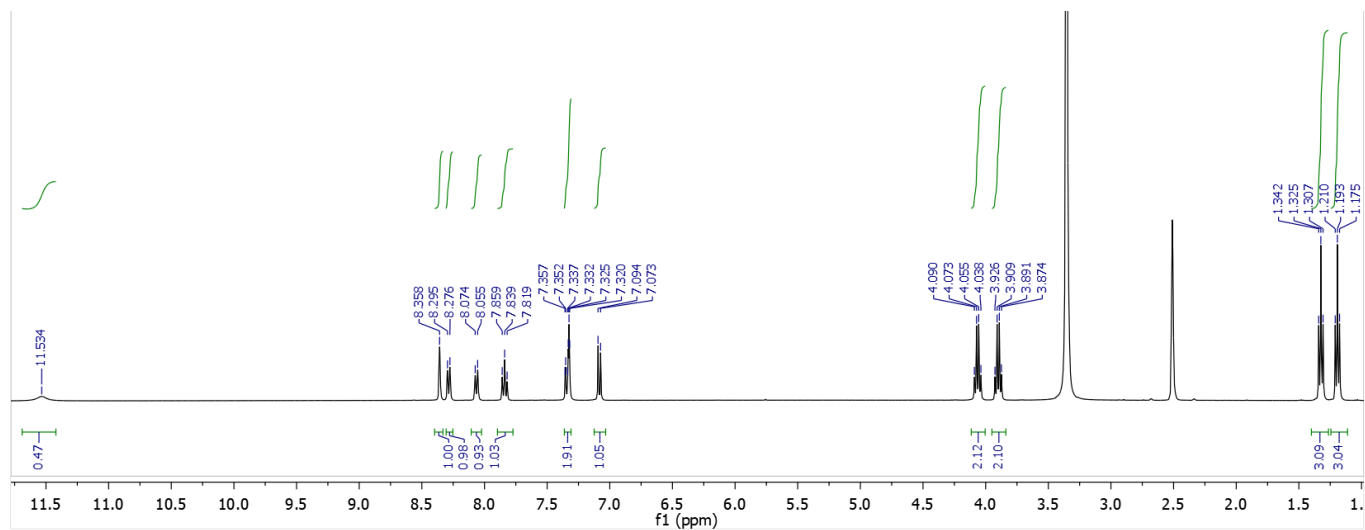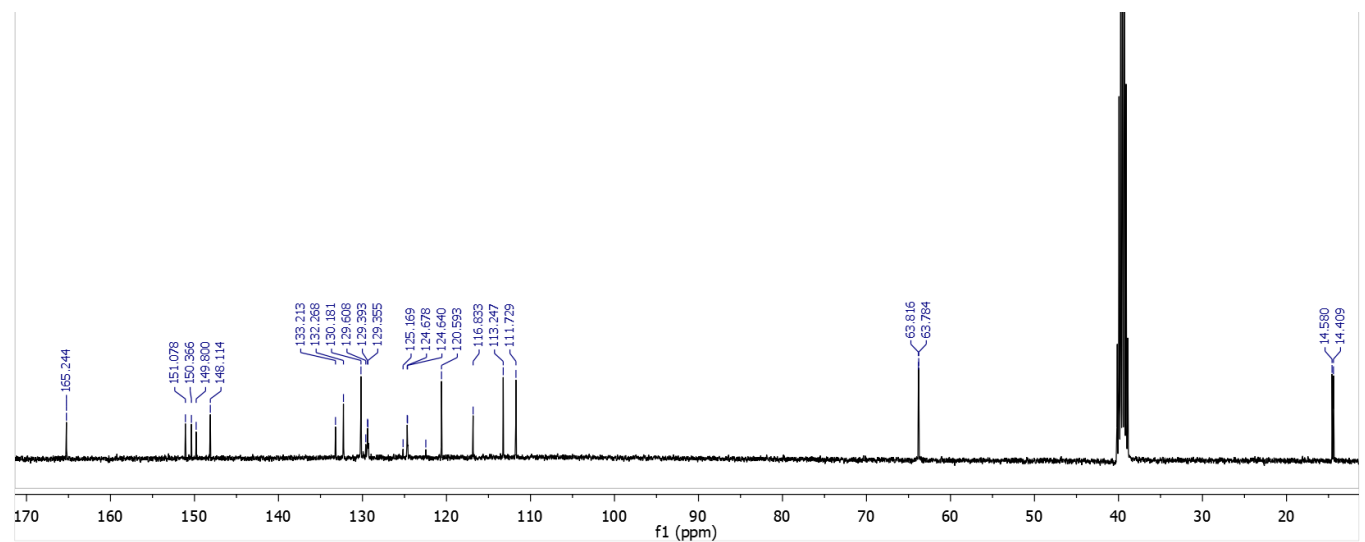

**Figure S11.** <sup>1</sup>H NMR at 400 MHz and <sup>13</sup>C NMR at 100 MHz spectra for compound **14**

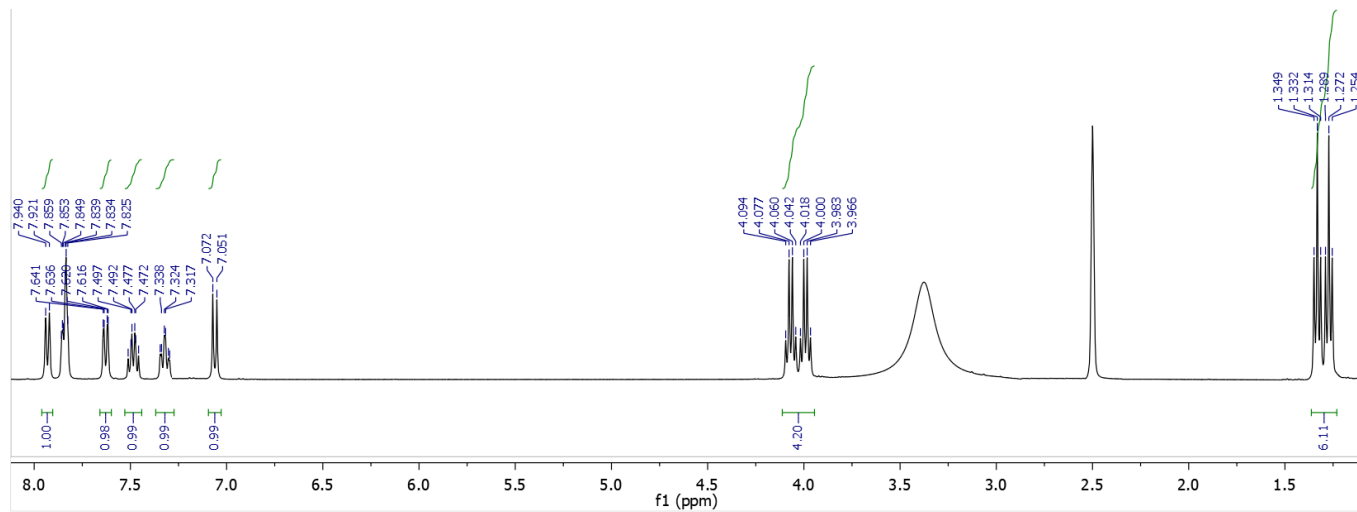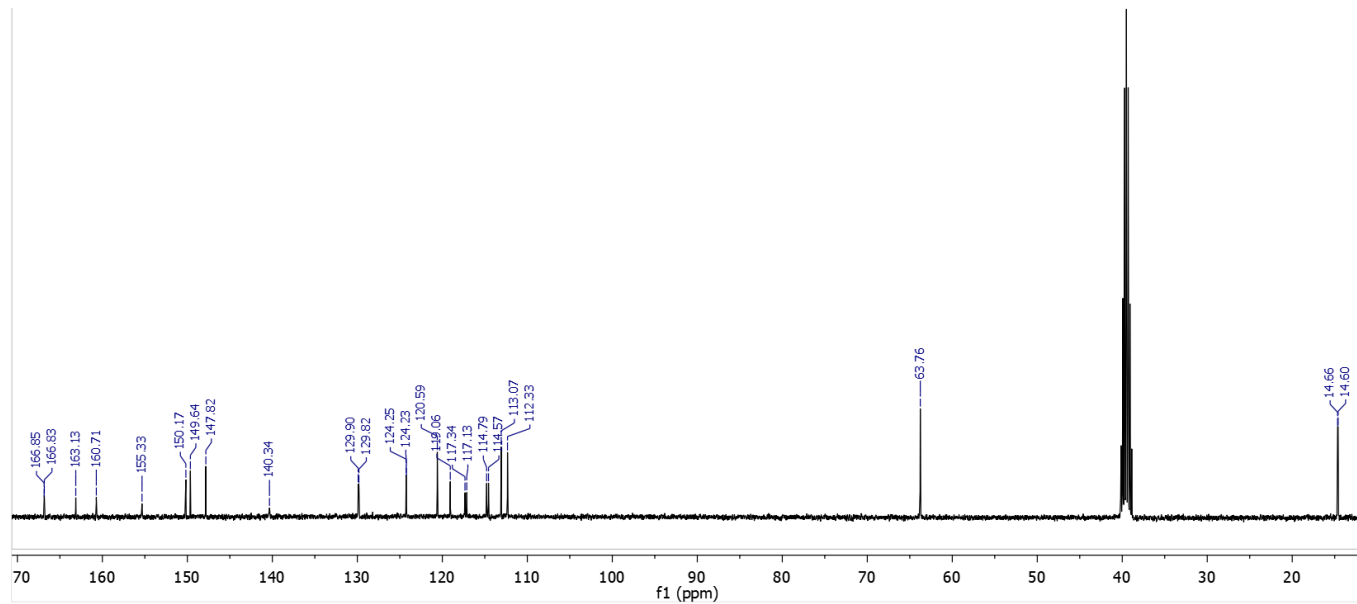

**Figure S12.**  $^1\text{H}$  NMR at 400 MHz and  $^{13}\text{C}$  NMR at 100 MHz spectra for compound **15**

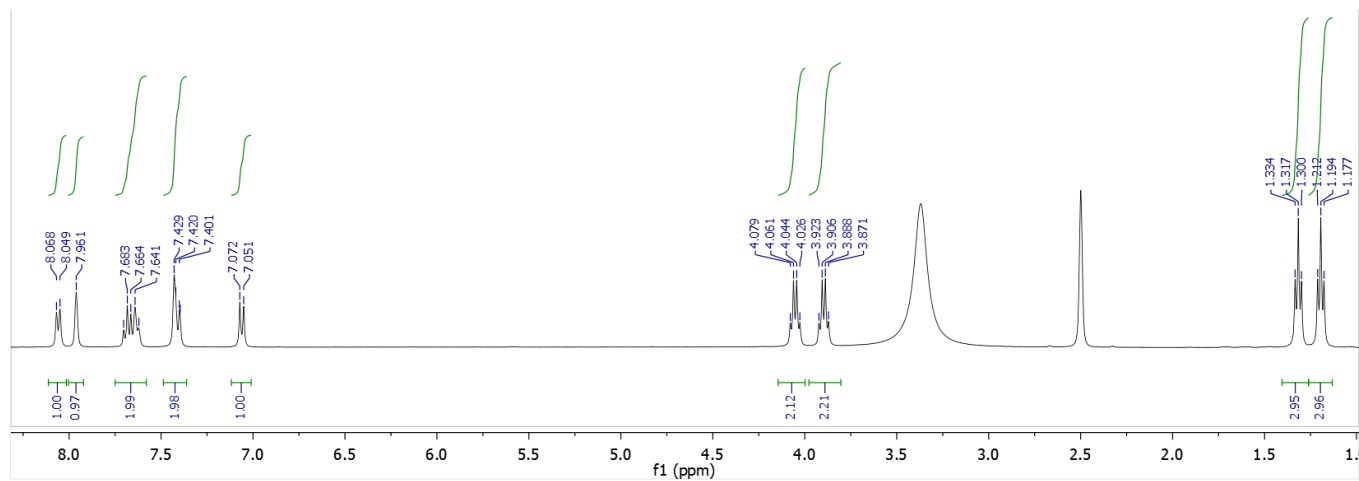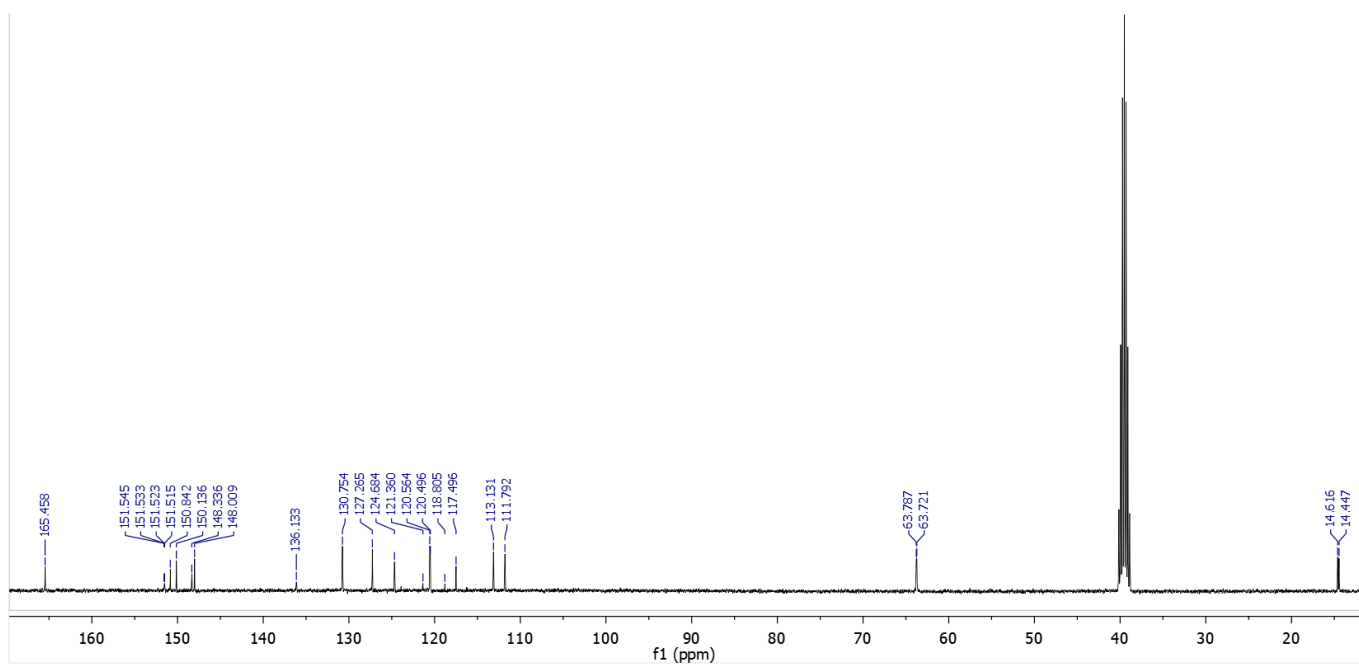

**Figure S13.**  $^1\text{H}$  NMR at 400 MHz and  $^{13}\text{C}$  NMR at 100 MHz spectra for compound 16

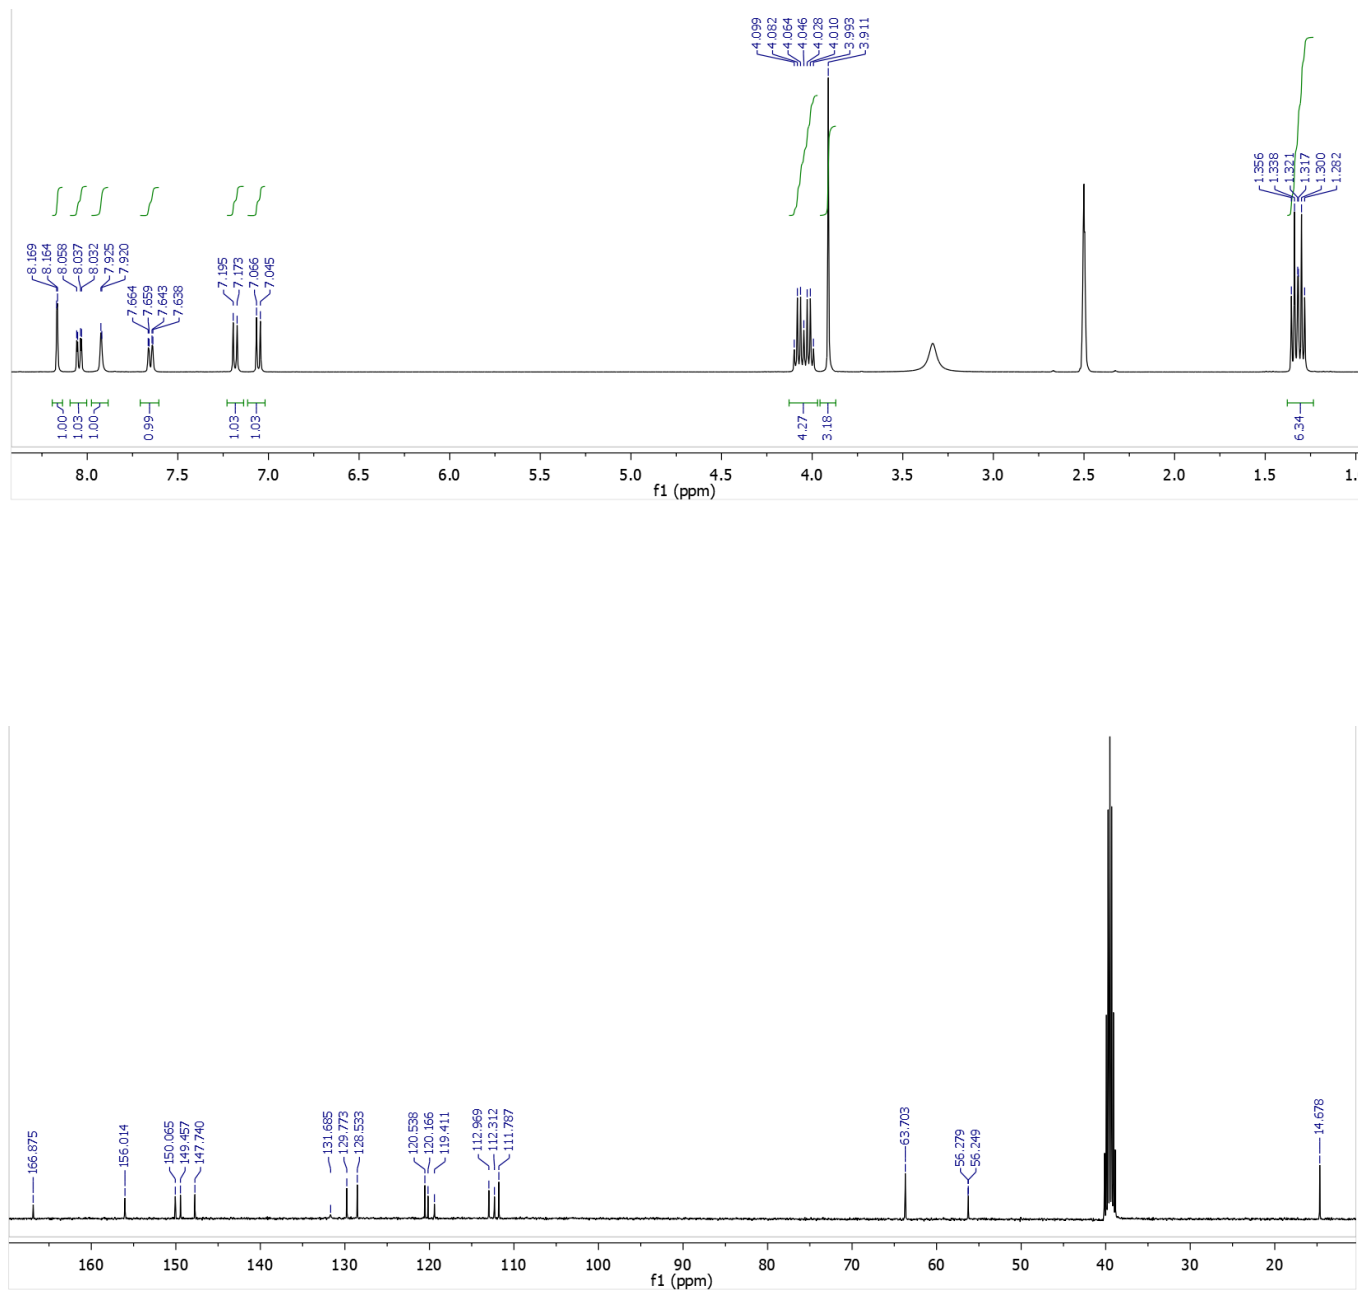

Figure S14. <sup>1</sup>H NMR at 400 MHz and <sup>13</sup>C NMR at 100 MHz spectra for compound 17

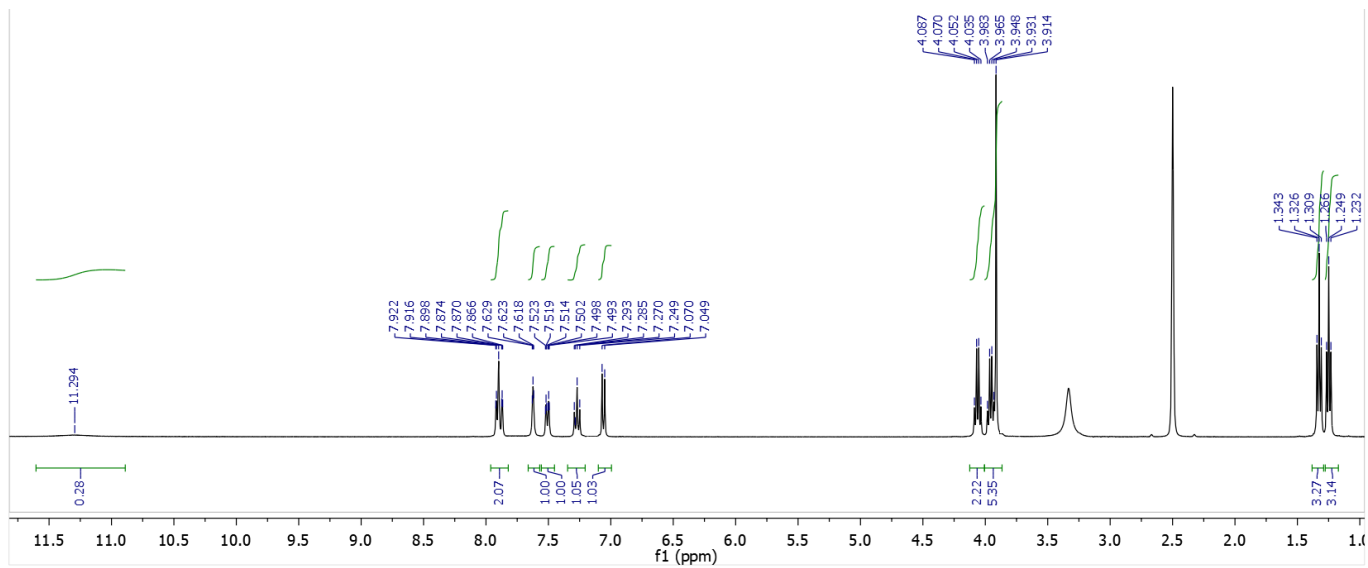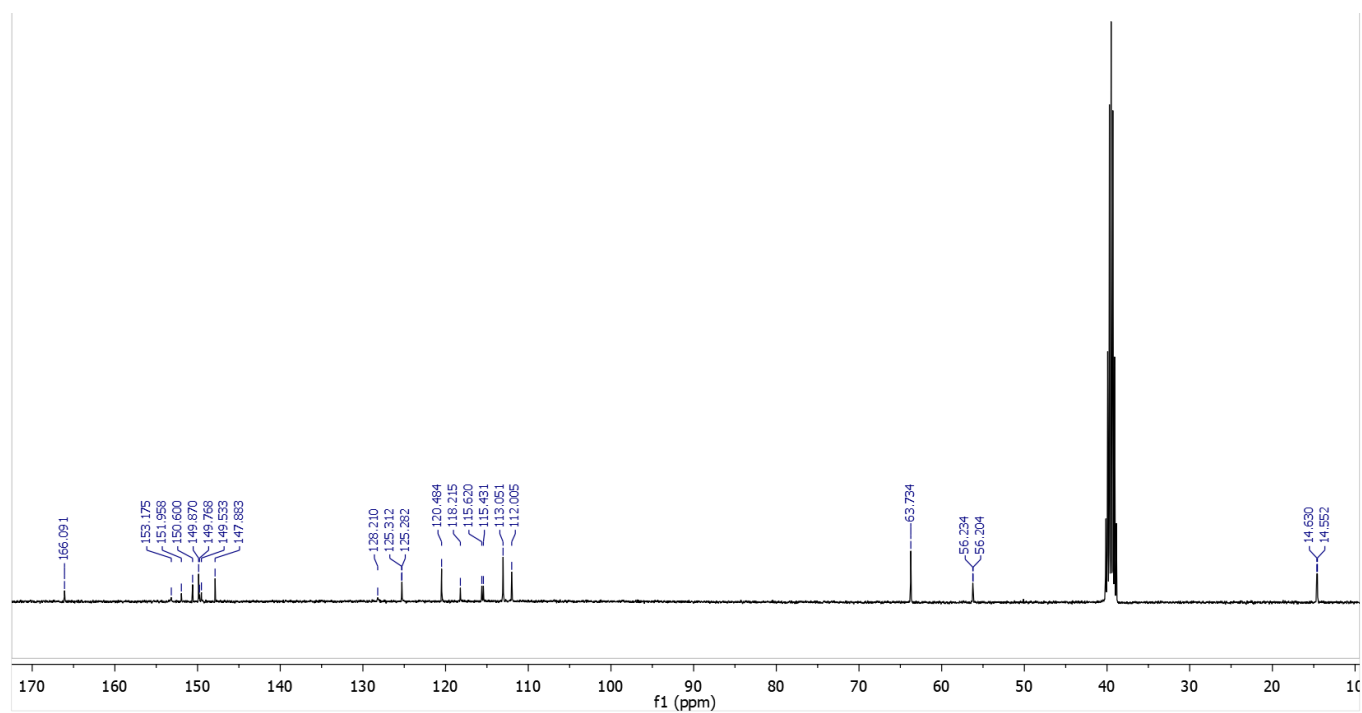

Figure S15. <sup>1</sup>H NMR at 400 MHz and <sup>13</sup>C NMR at 100 MHz spectra for compound 26

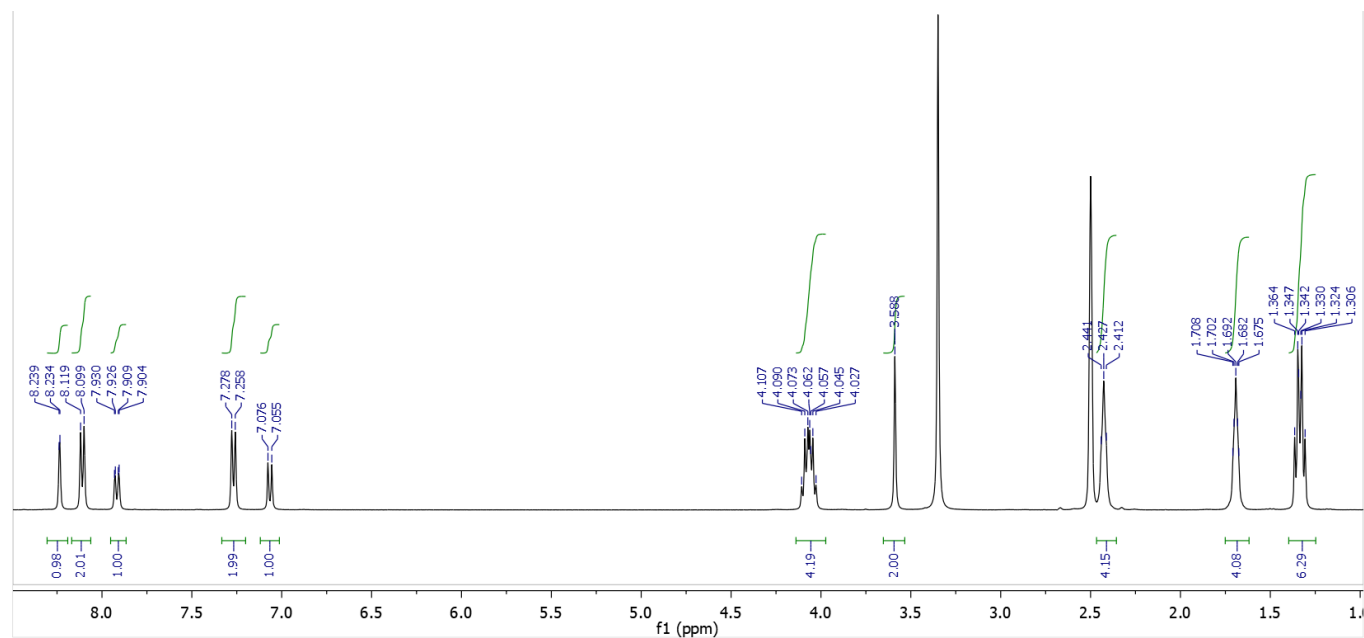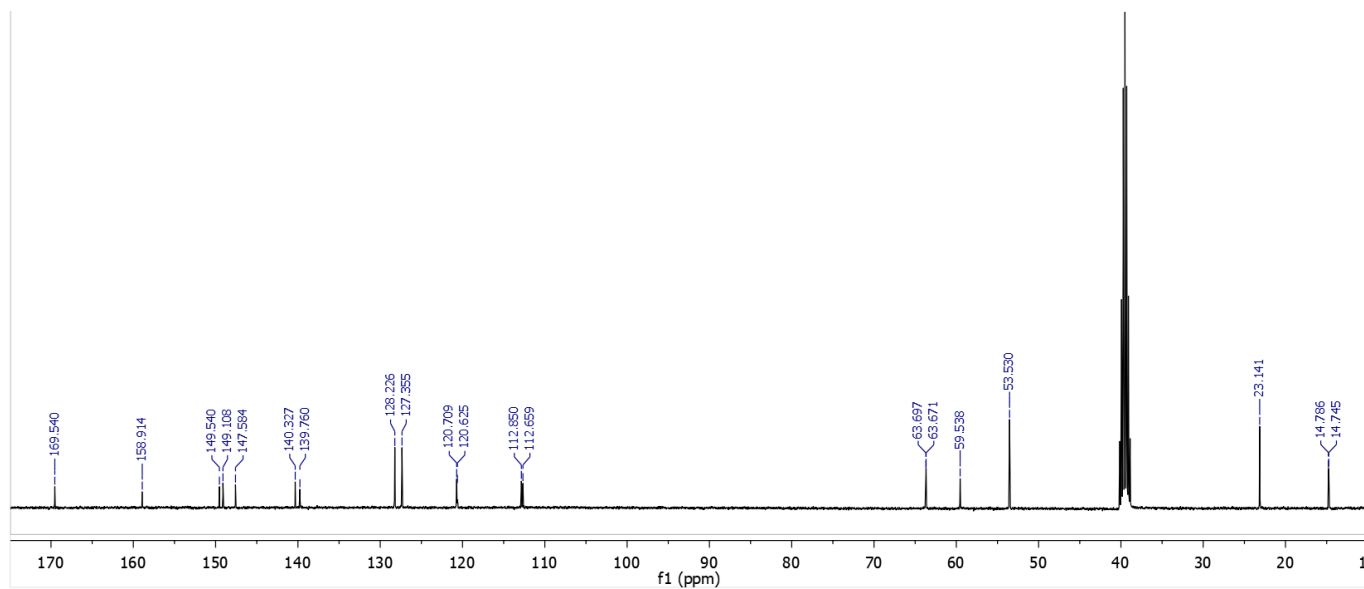



**Figure S16.**  $^1\text{H}$  NMR at 400 MHz and  $^{13}\text{C}$  NMR at 100 MHz spectra for compound **27**

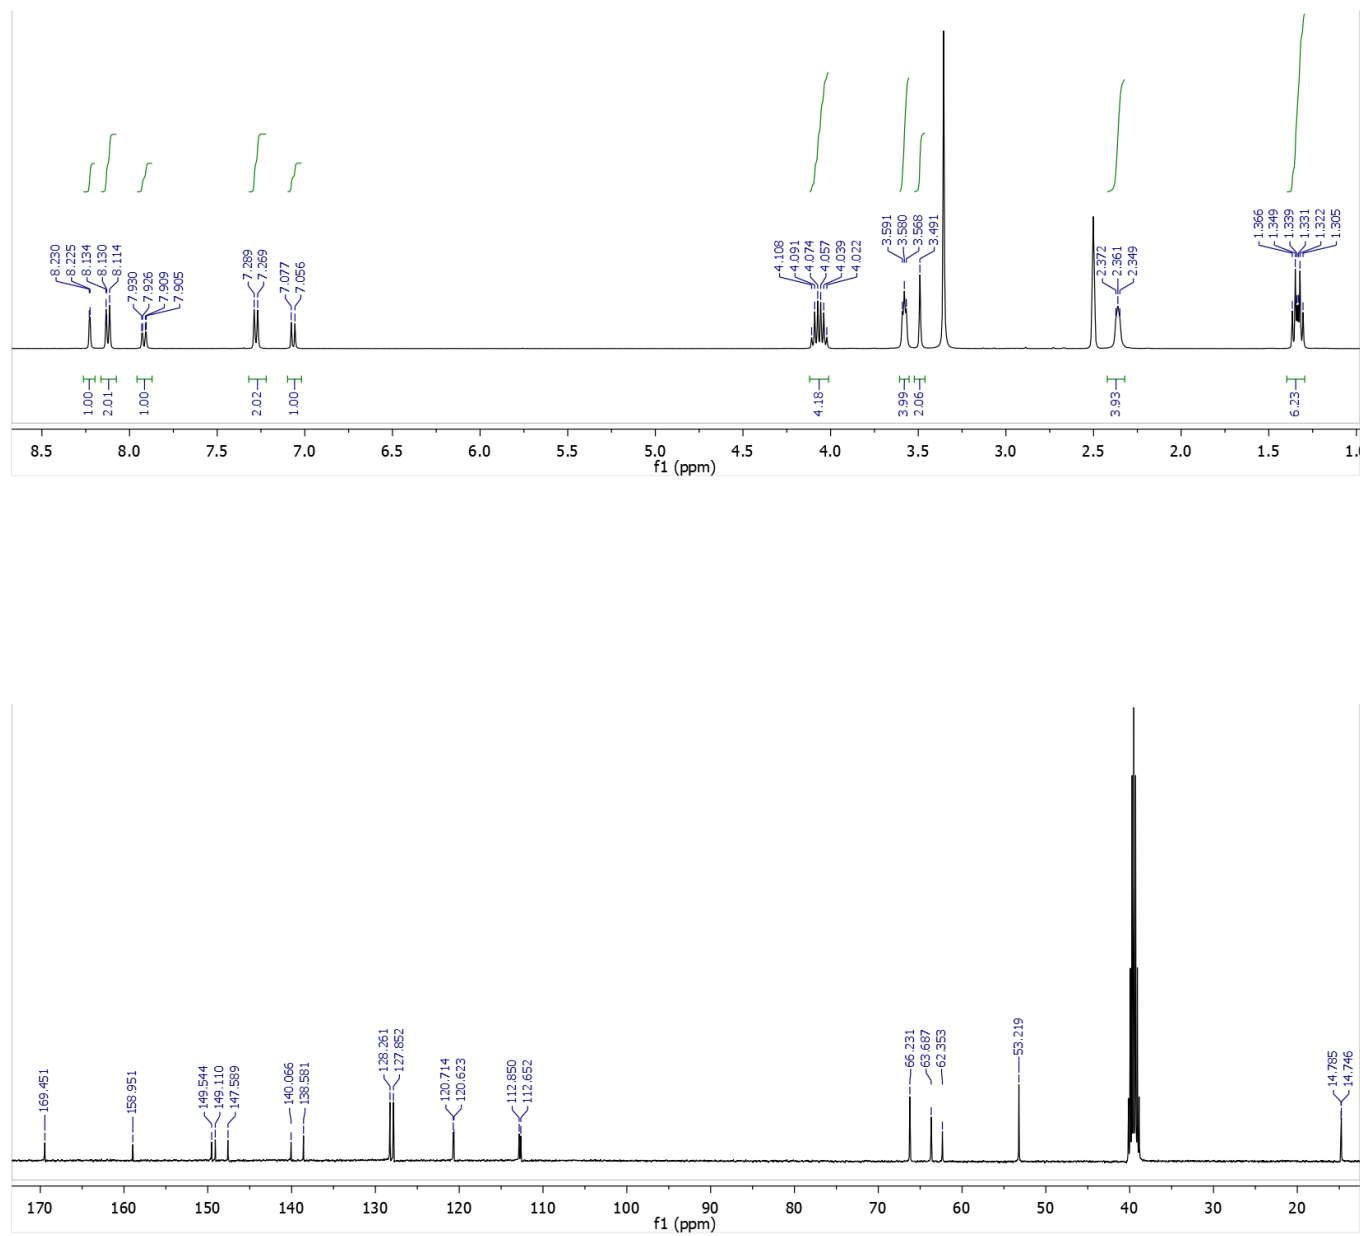

**Figure S17.**  $^1\text{H}$  NMR at 400 MHz and  $^{13}\text{C}$  NMR at 100 MHz spectra for compound **28**

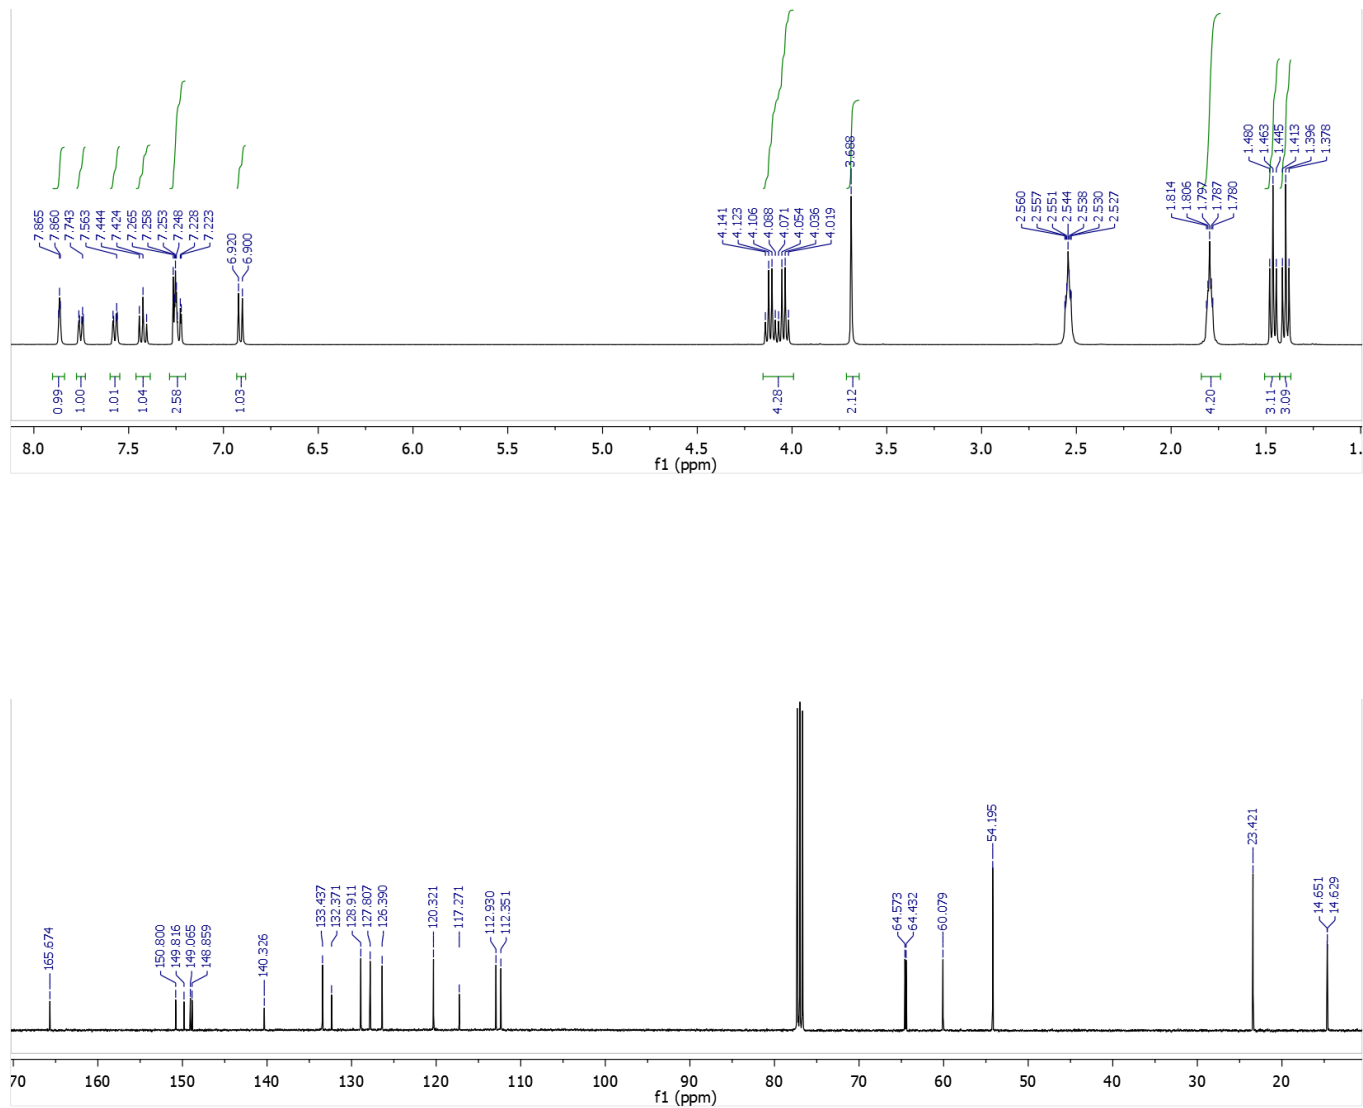

**Figure S18.**  $^1\text{H}$  NMR at 400 MHz and  $^{13}\text{C}$  NMR at 100 MHz spectra for compound **29**

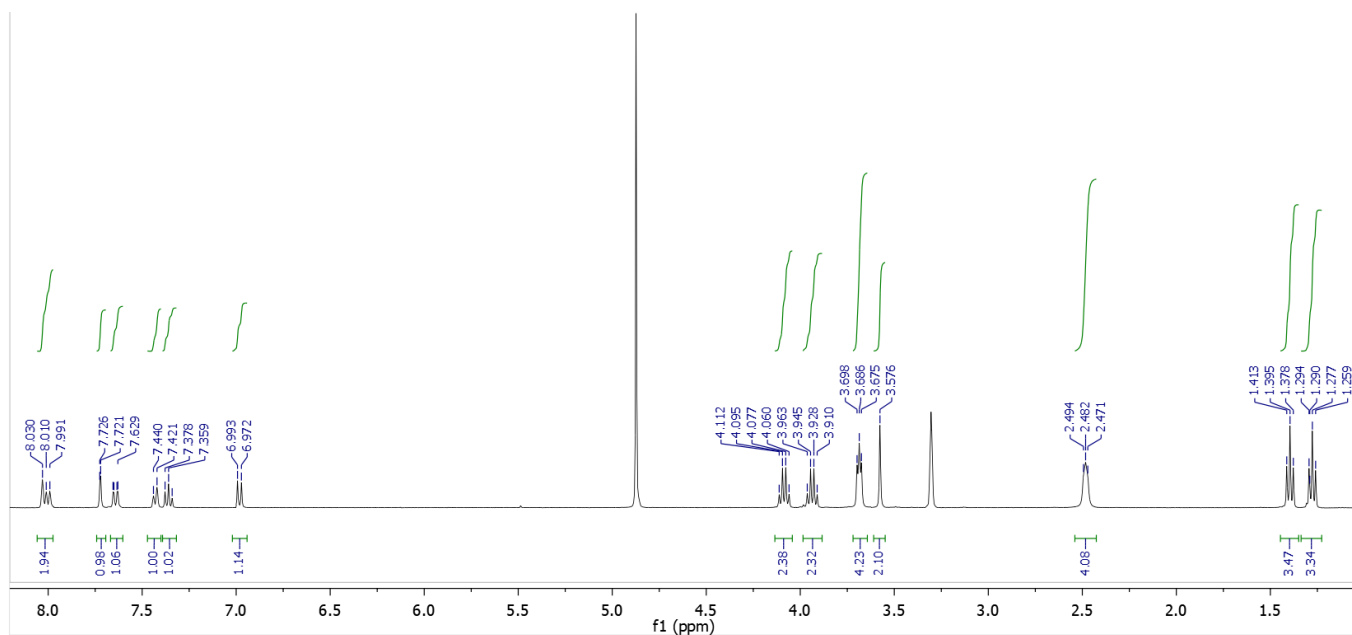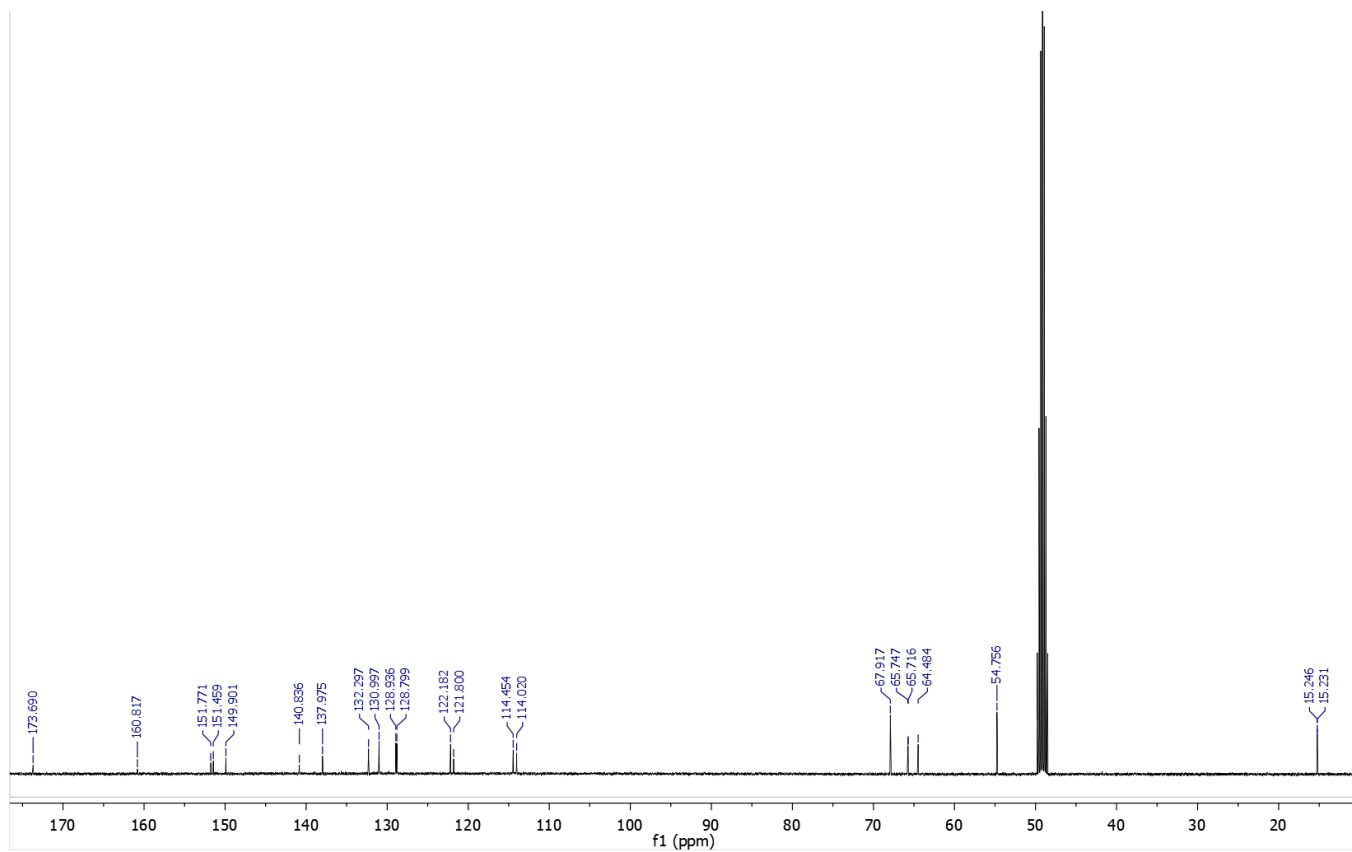

**Figure S19.**  $^1\text{H}$  NMR at 400 MHz and  $^{13}\text{C}$  NMR at 100 MHz spectra for compound **31**

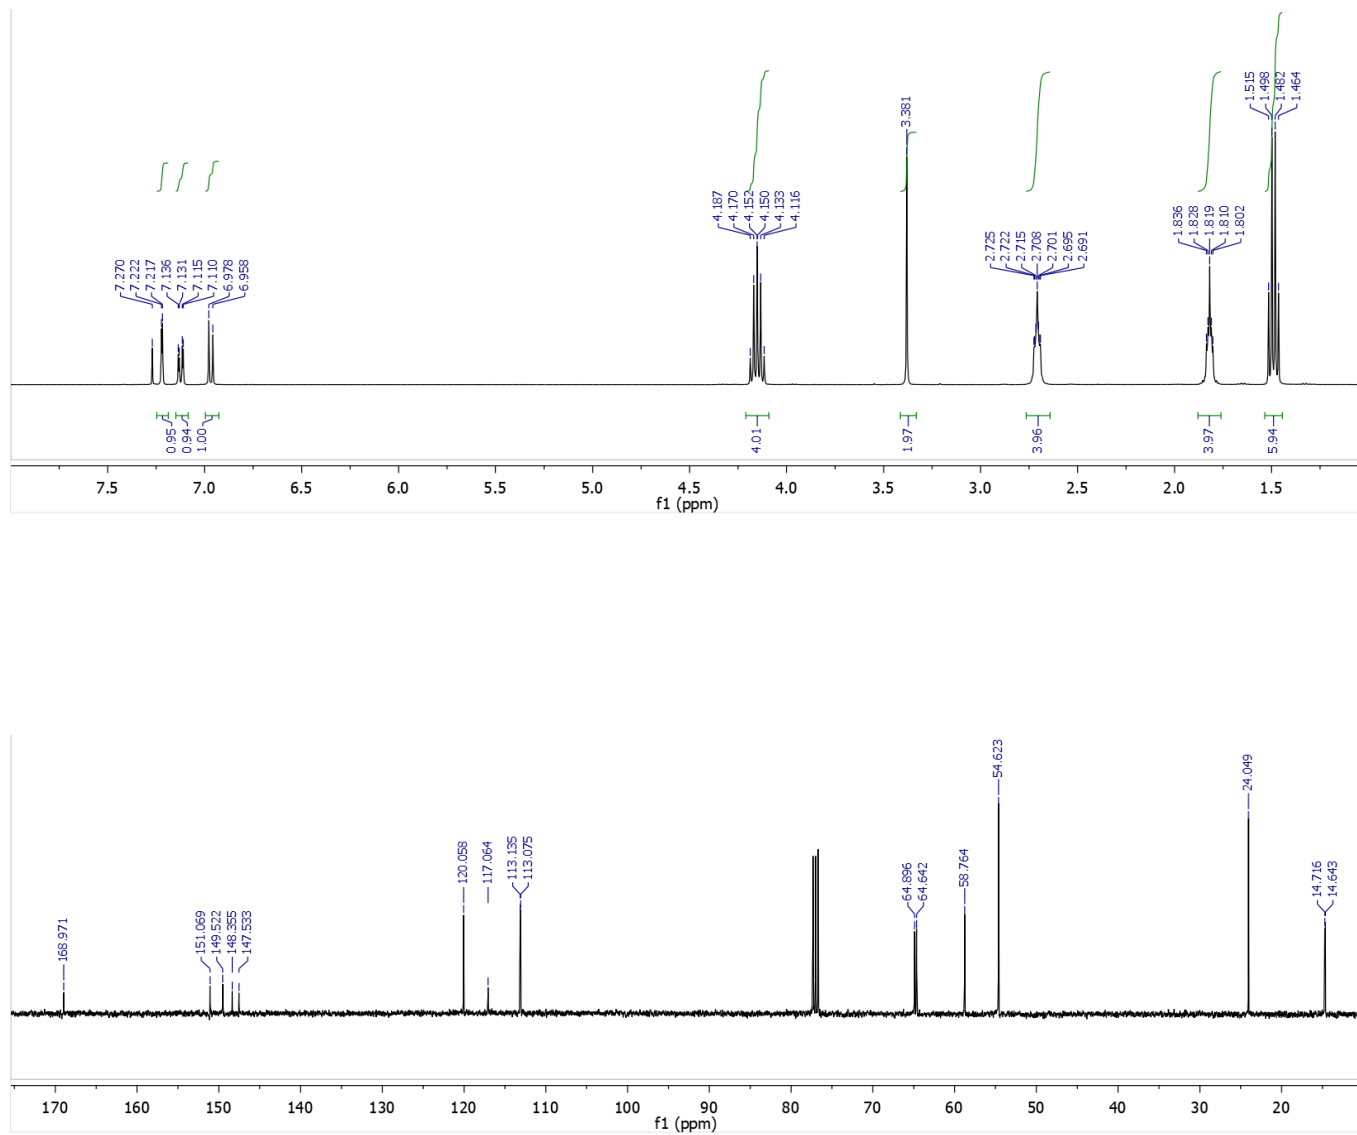

Figure S20. <sup>1</sup>H NMR at 400 MHz and <sup>13</sup>C NMR at 100 MHz spectra for compound 32

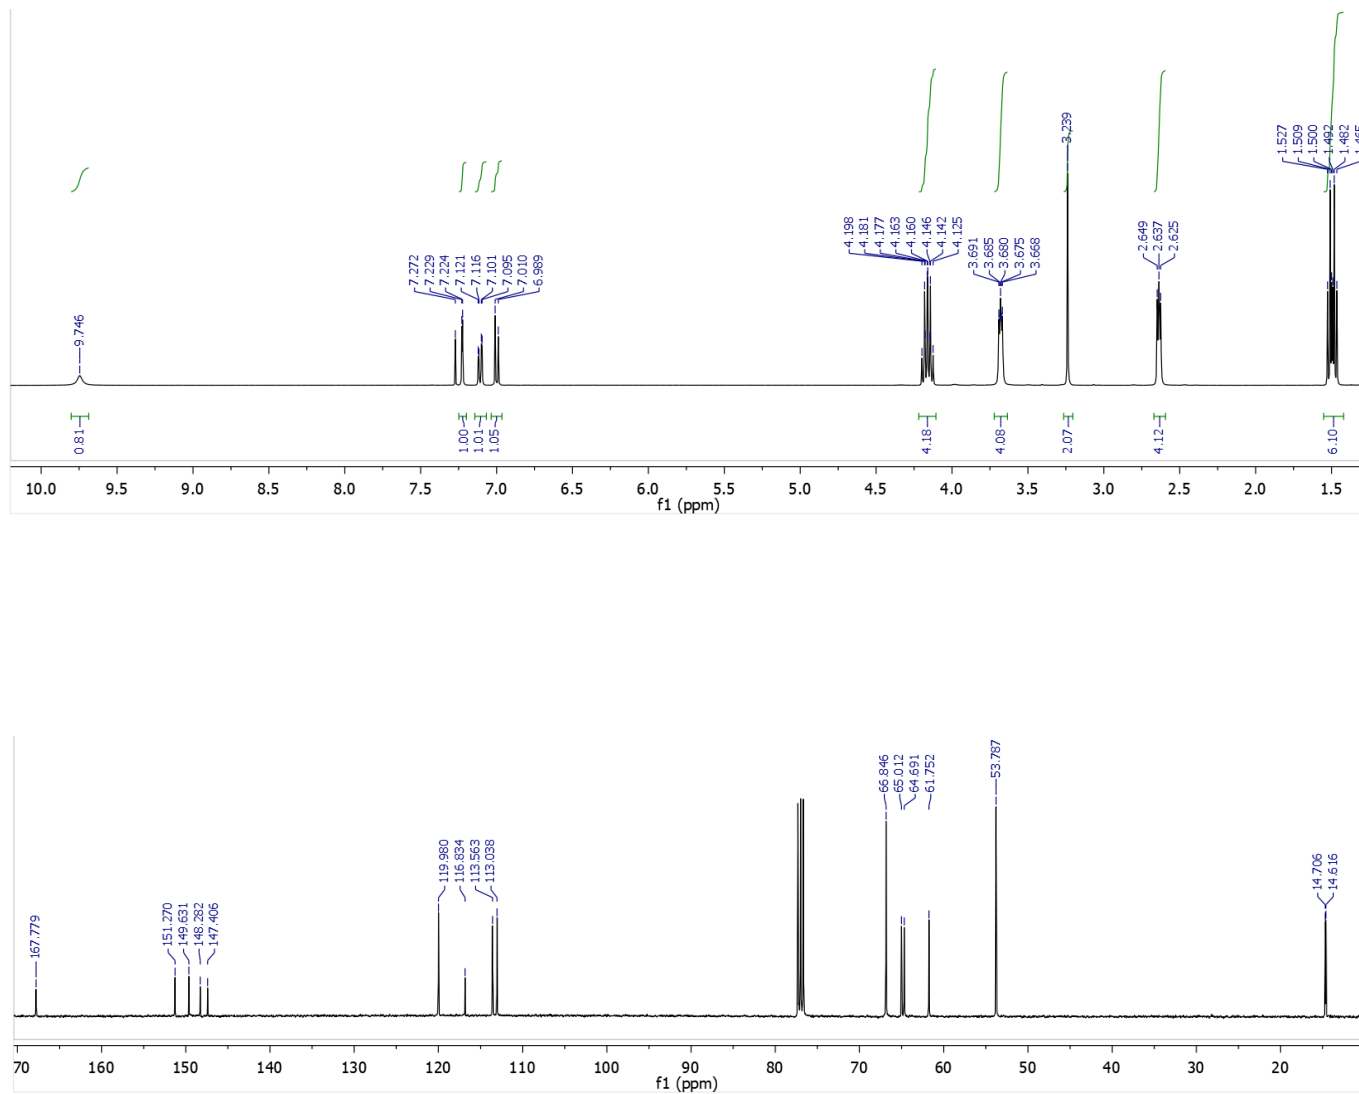

Figure S21. <sup>1</sup>H NMR at 400 MHz and <sup>13</sup>C NMR at 100 MHz spectra for compound 34

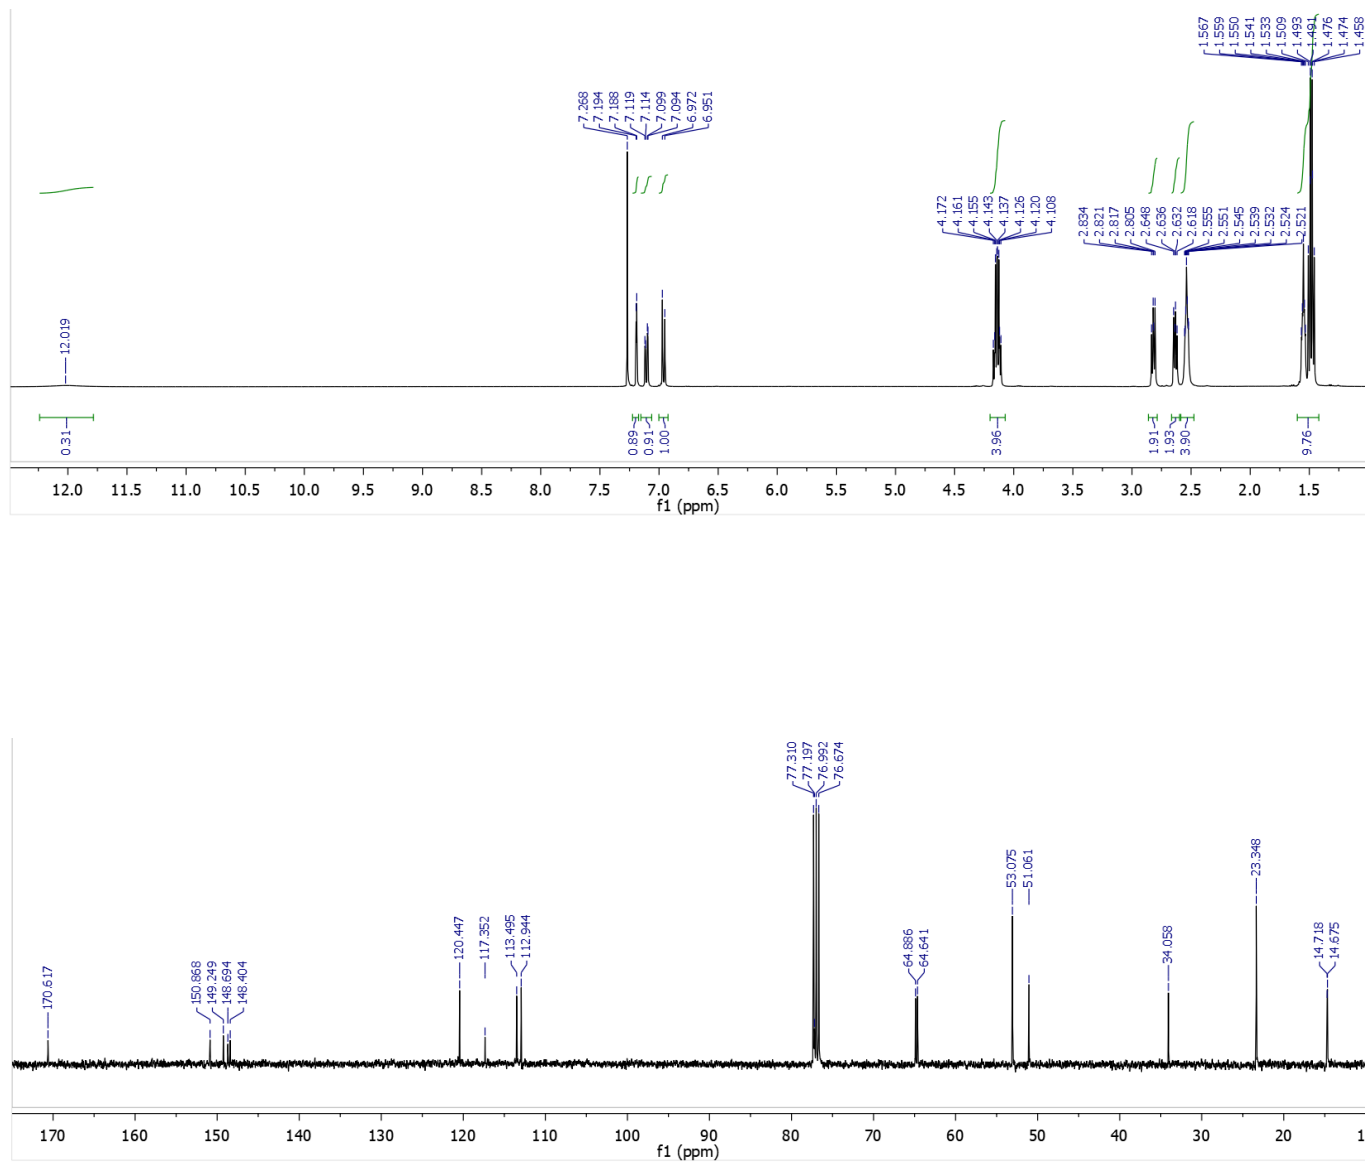

Figure S22. <sup>1</sup>H NMR at 400 MHz and <sup>13</sup>C NMR at 100 MHz spectra for compound 35

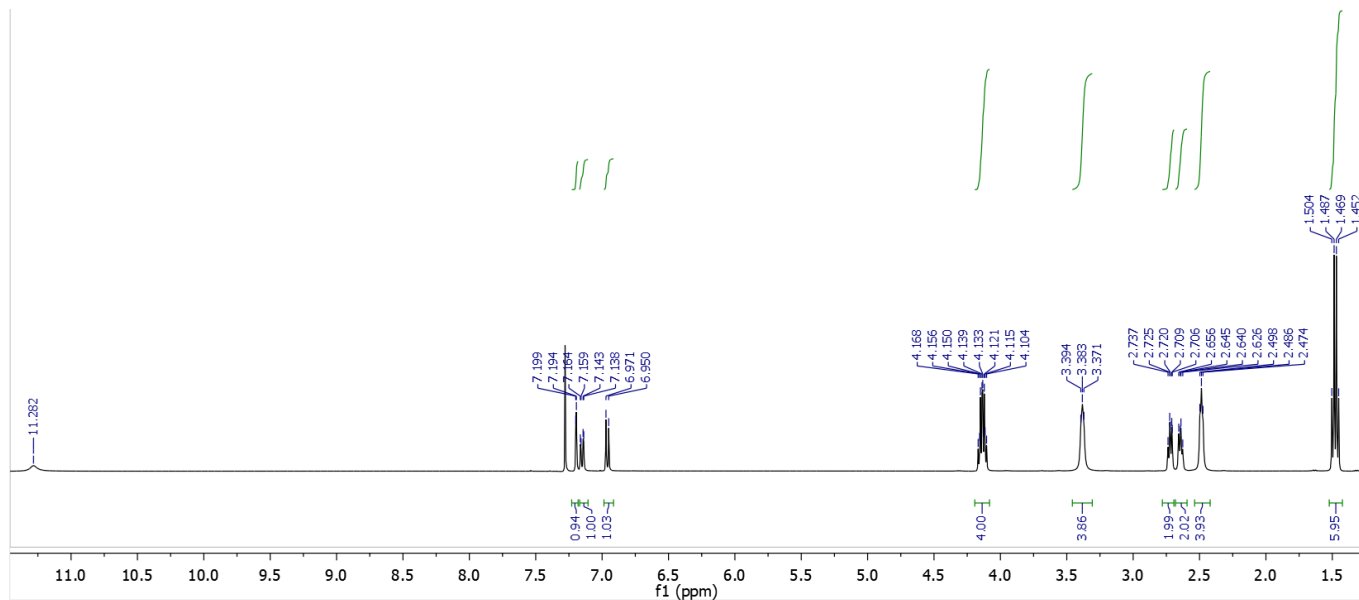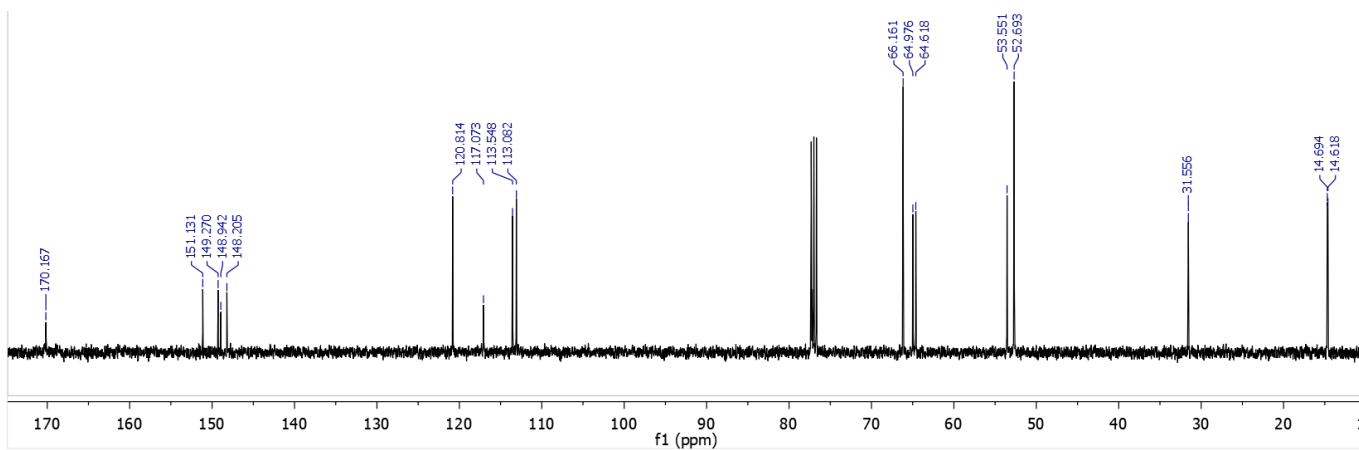

Figure S23. <sup>1</sup>H NMR at 400 MHz and <sup>13</sup>C NMR at 100 MHz spectra for compound 39

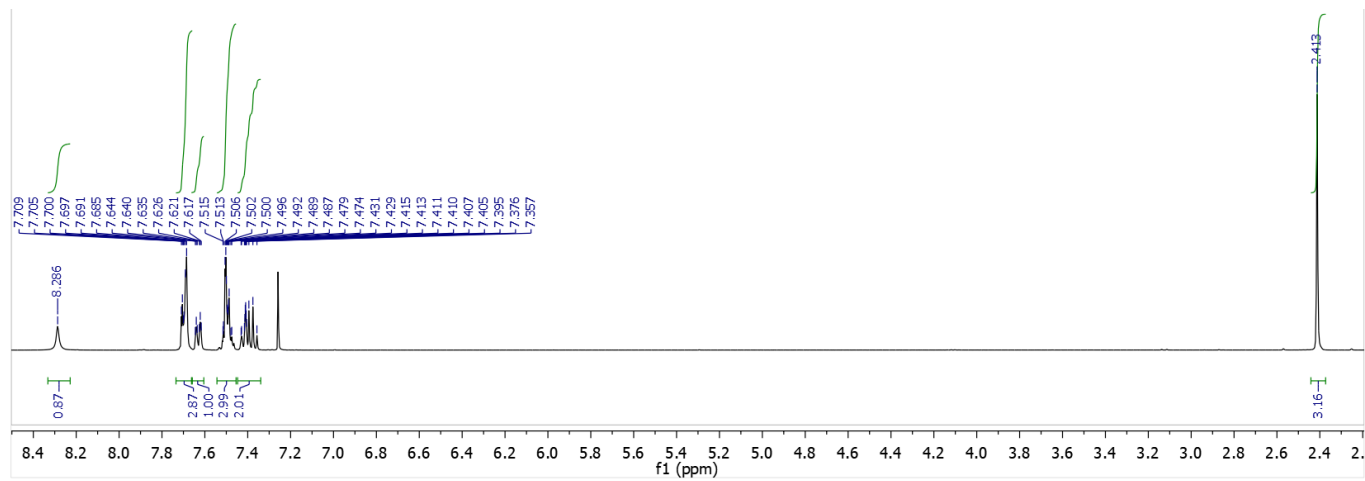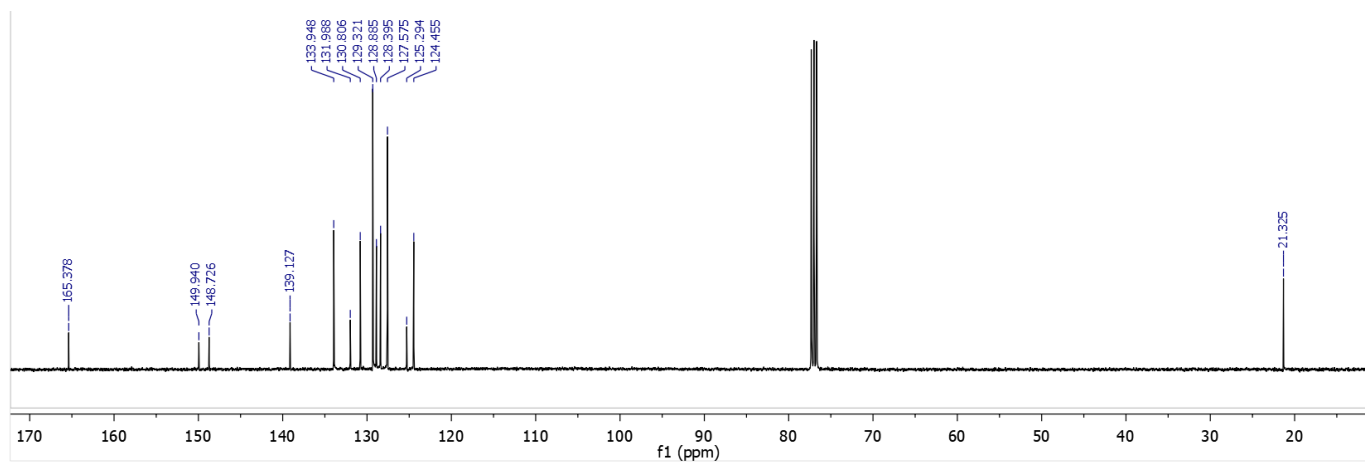



**Figure S24.** Dose-response curves of compound **1** against *P.f.* NF54, *P.f.* K<sub>1</sub> and L-6 cells.

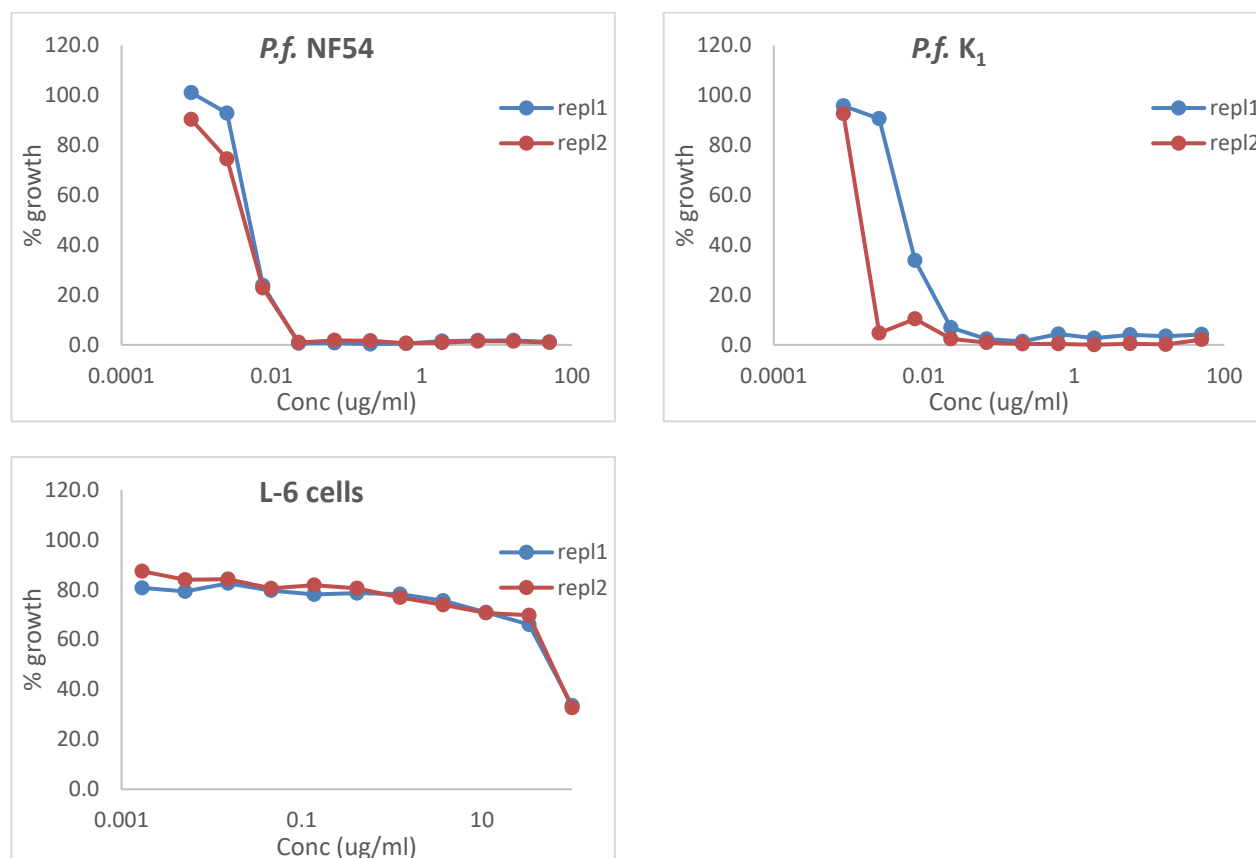

**Figure S25.** Dose-response curves of compound **10** against *P.f.* NF54, *P.f.* K<sub>1</sub> and L-6 cells.

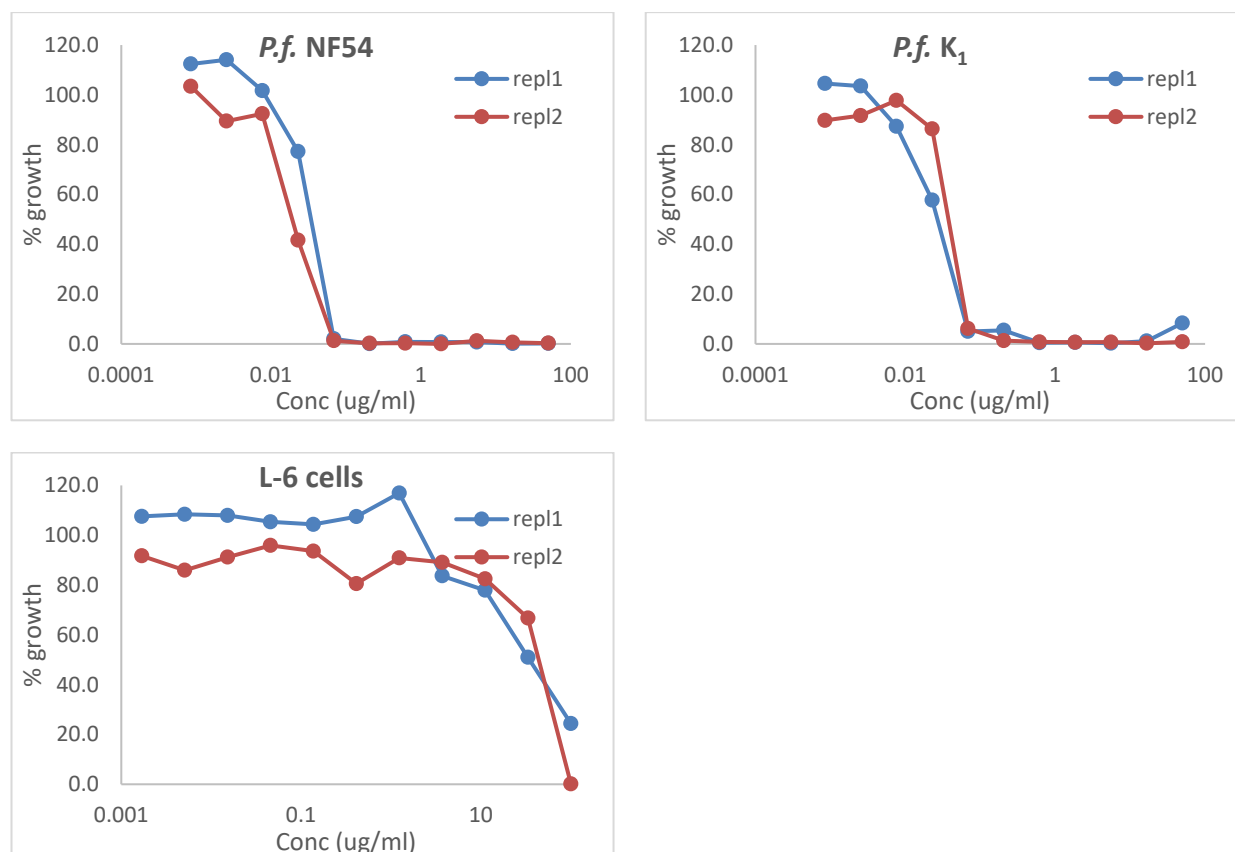

**Figure S26.** Dose-response curves of compound **11** against *P.f.* NF54 and L-6 cells.

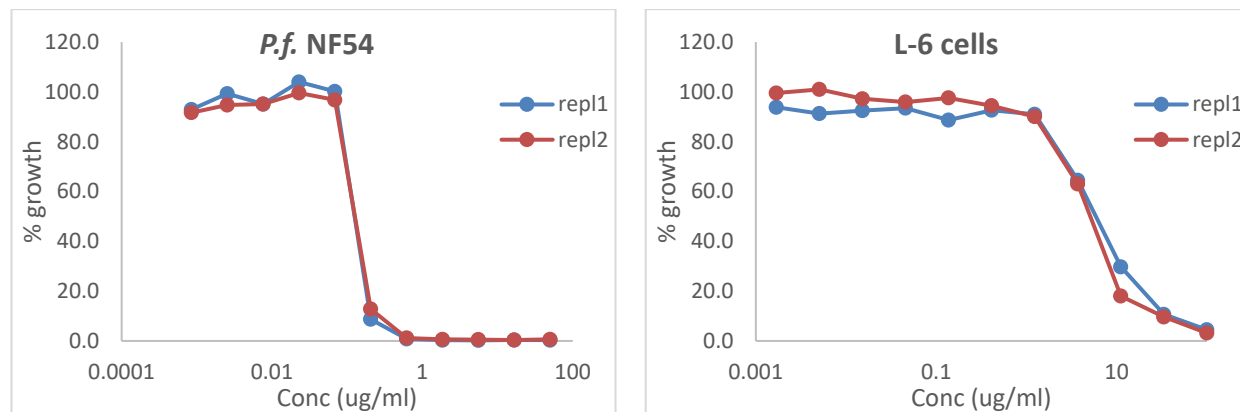

**Figure S27.** Dose-response curves of compound **12** against *P.f.* NF54 and L-6 cells.

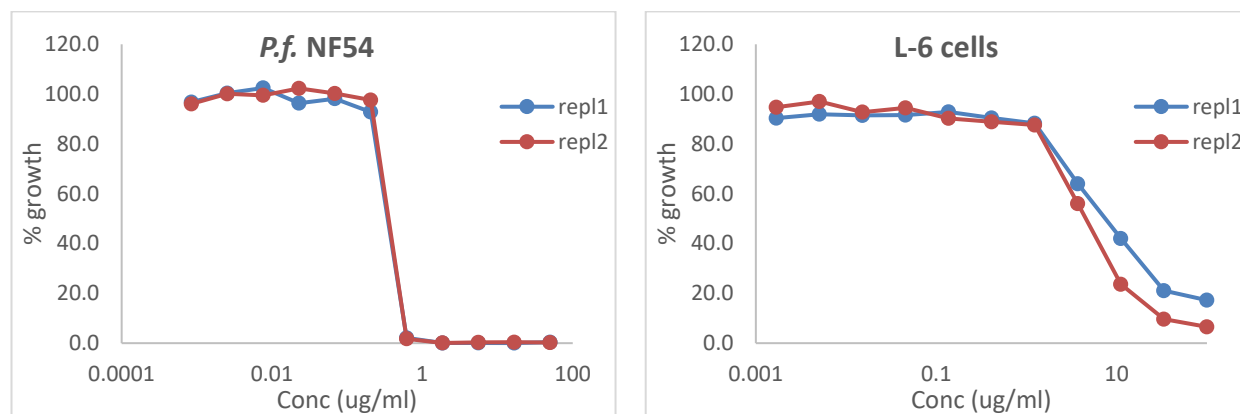

**Figure S28.** Dose-response curves of compound **13** against *P.f.* NF54, *P.f.* K<sub>1</sub> and L-6 cells.

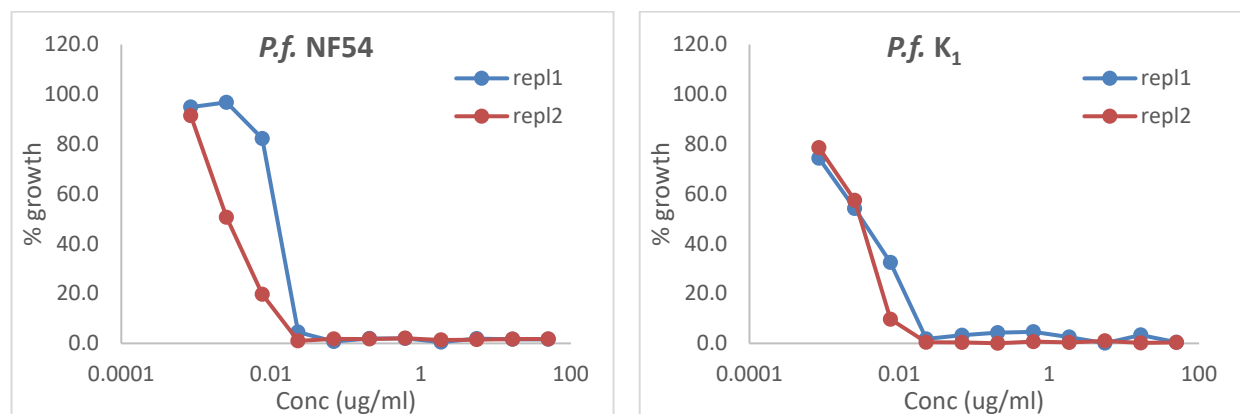

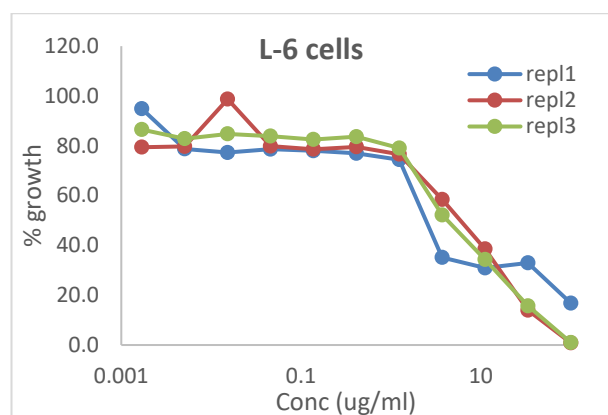

**Figure S29.** Dose-response curves of compound **14** against *P.f.* NF54, *P.f.* K<sub>1</sub> and L-6 cells.

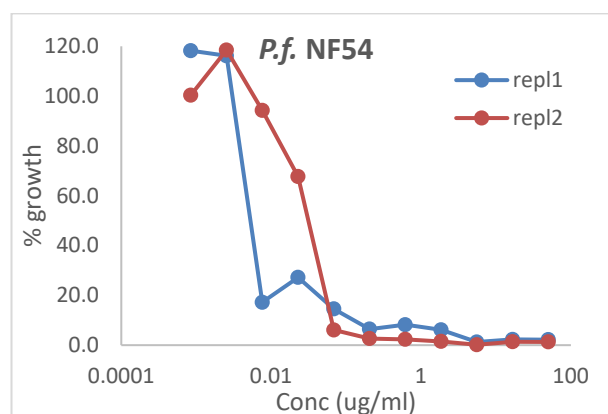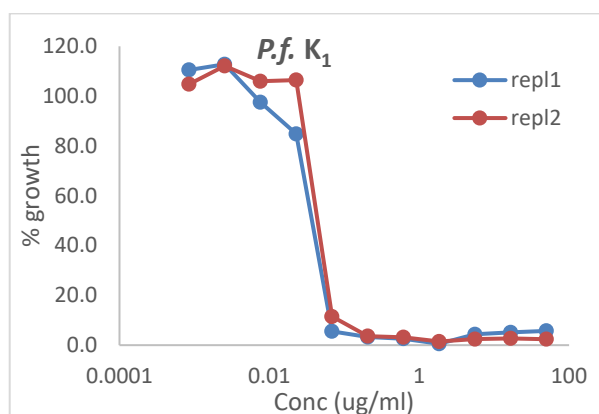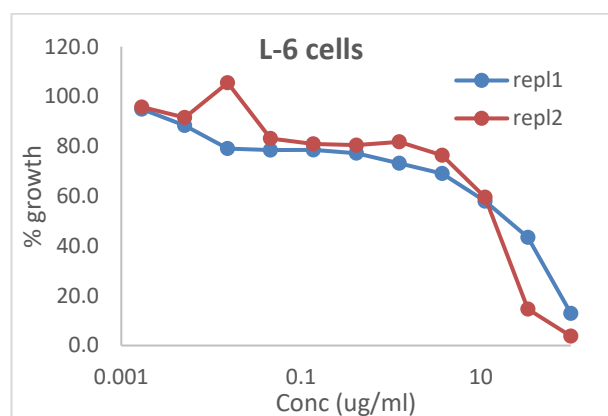

**Figure S30.** Dose-response curves of compound **15** against *P.f.* NF54 and L-6 cells.

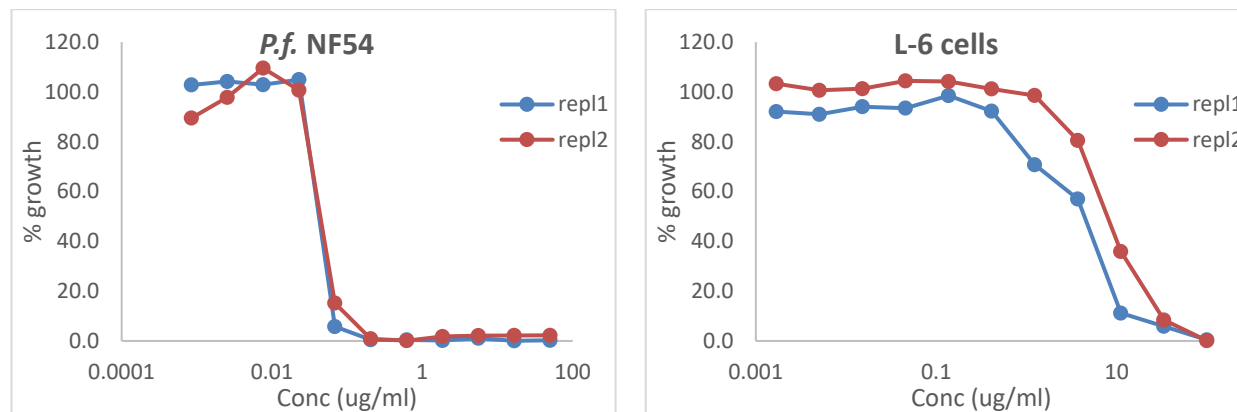

**Figure S31.** Dose-response curves of compound **16** against *P.f.* NF54, *P.f.* K<sub>1</sub> and L-6 cells.

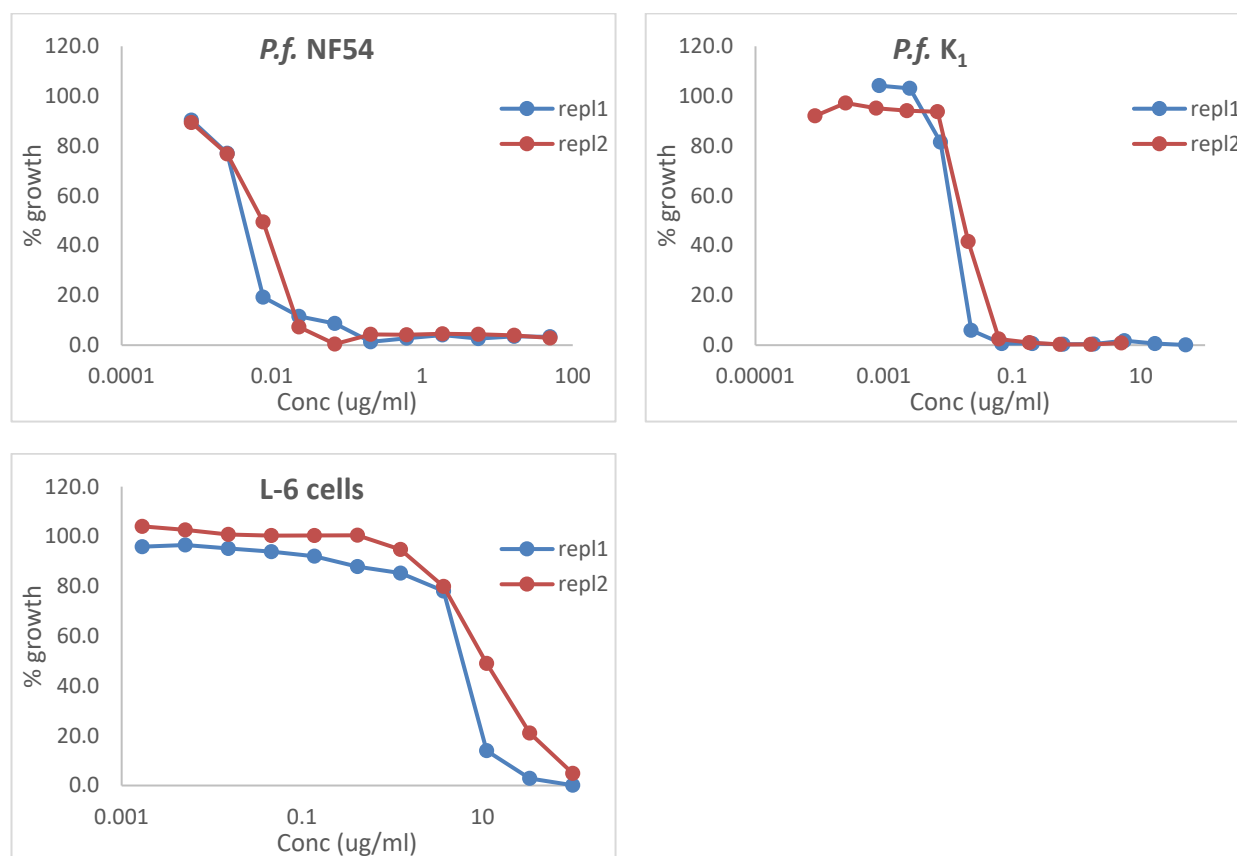

**Figure S32.** Dose-response curves of compound **17** against *P.f.* NF54, *P.f.* K<sub>1</sub> and L-6 cells.

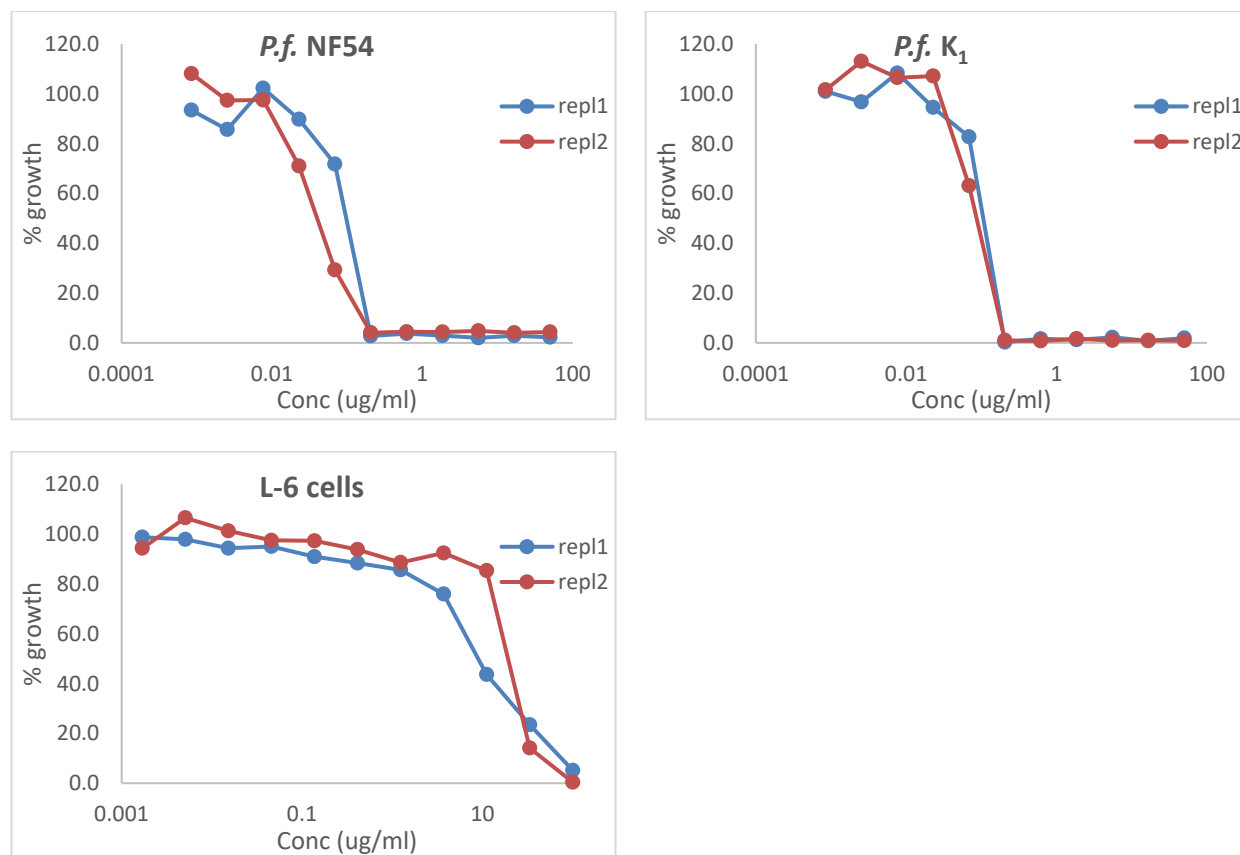

**Figure S33.** Dose-response curves of compound **26** against *P.f.* NF54, *P.f.* K<sub>1</sub> and L-6 cells.

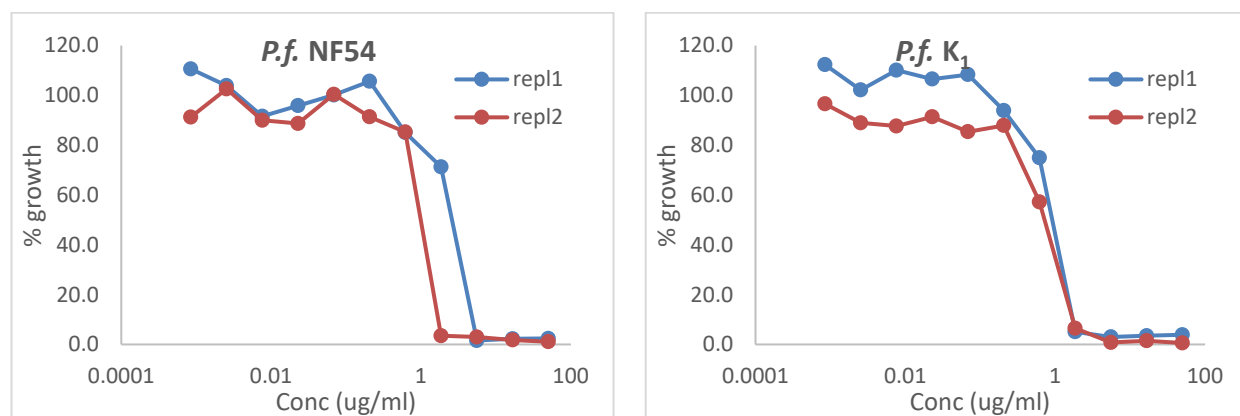

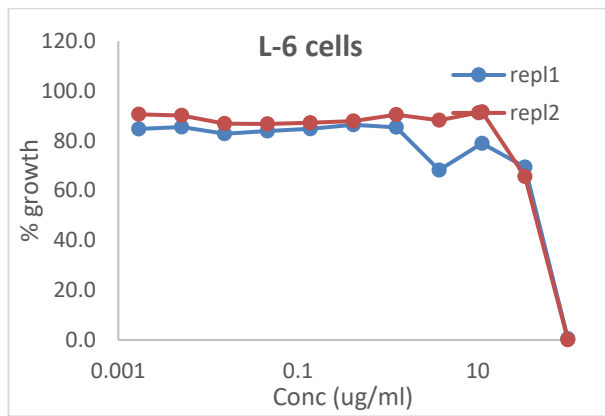

**Figure S34.** Dose-response curves of compound **27** against *P.f.* NF54, *P.f.* K<sub>1</sub> and L-6 cells.

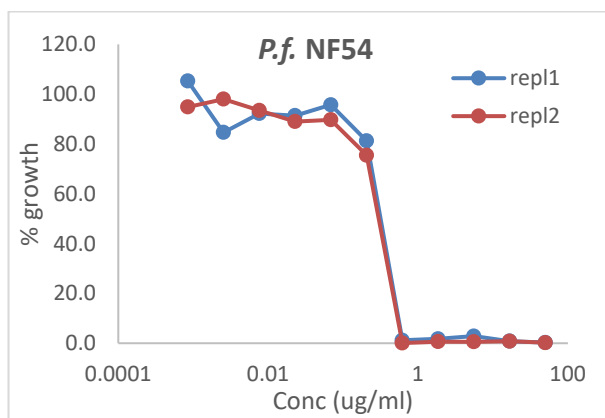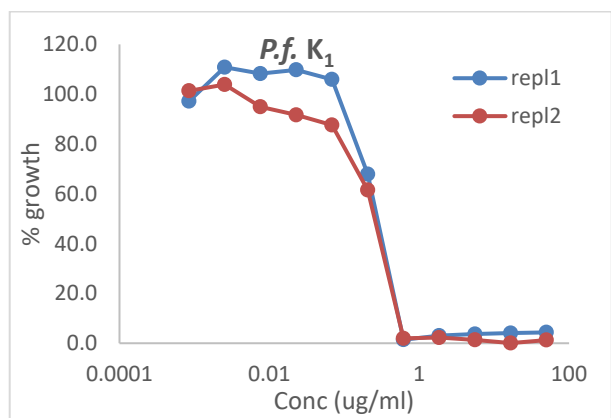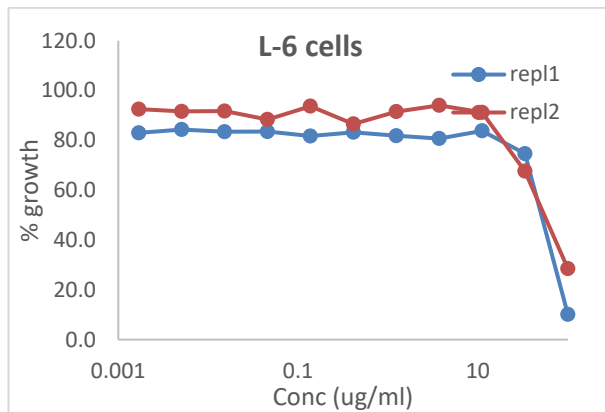

**Figure S35.** Dose-response curves of compound **28** against *P.f.* NF54 and L-6 cells.

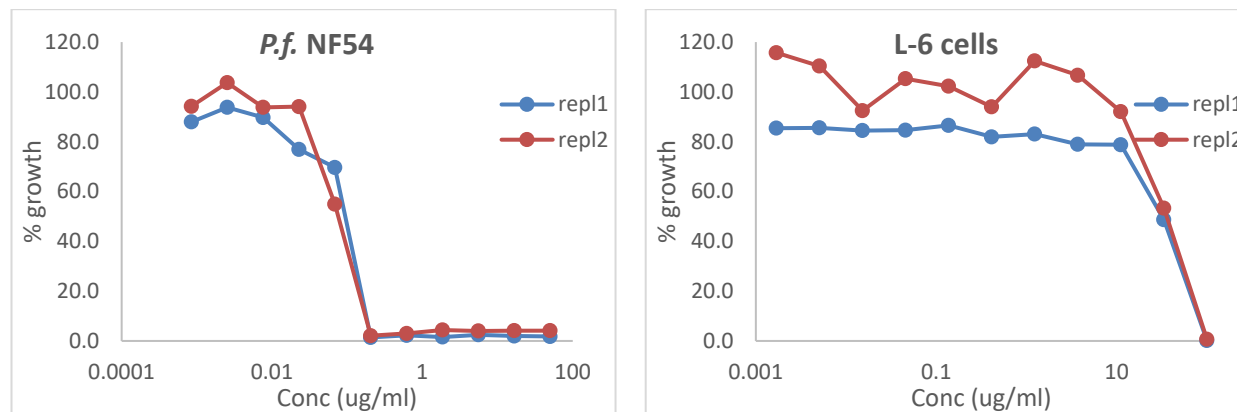

**Figure S36.** Dose-response curves of compound **29** against *P.f.* NF54 and L-6 cells.

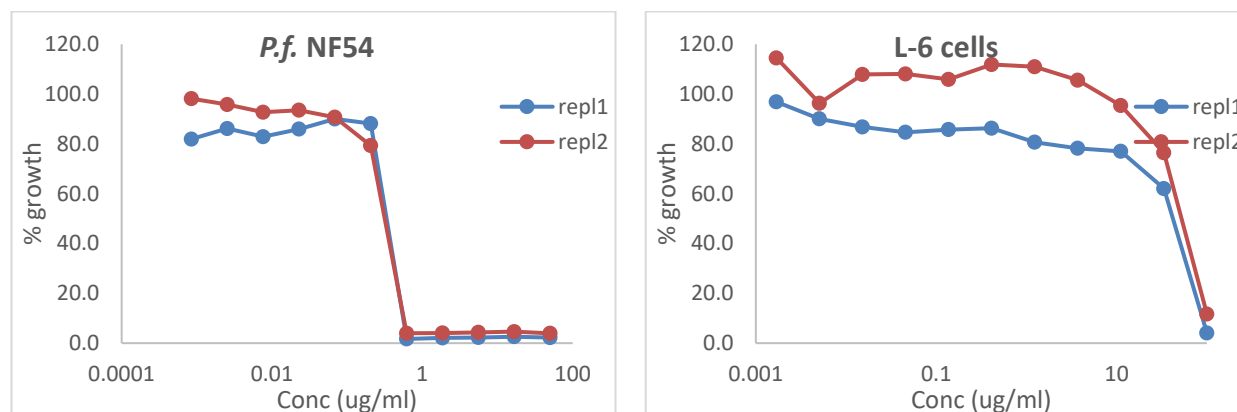

**Figure S37.** Dose-response curves of compound **31** against *P.f.* NF54, *P.f.* K<sub>1</sub> and L-6 cells.

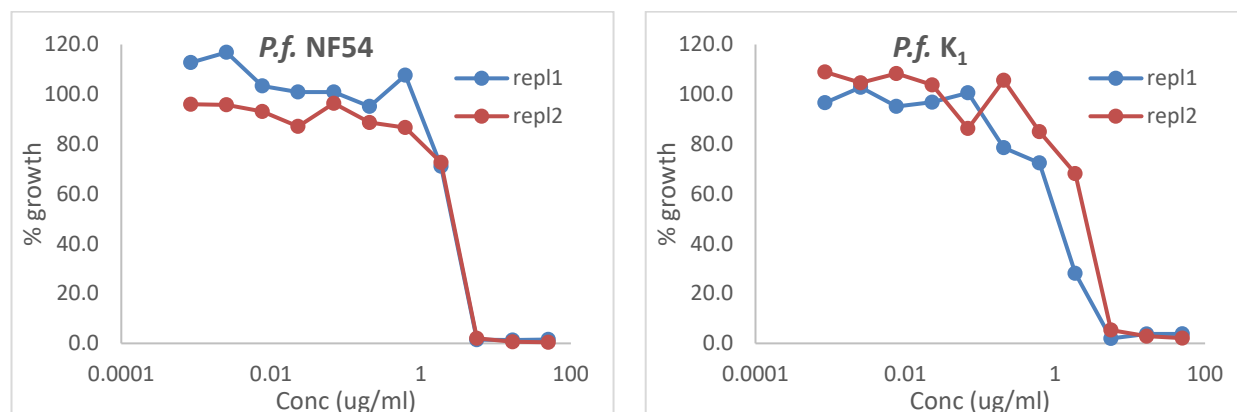

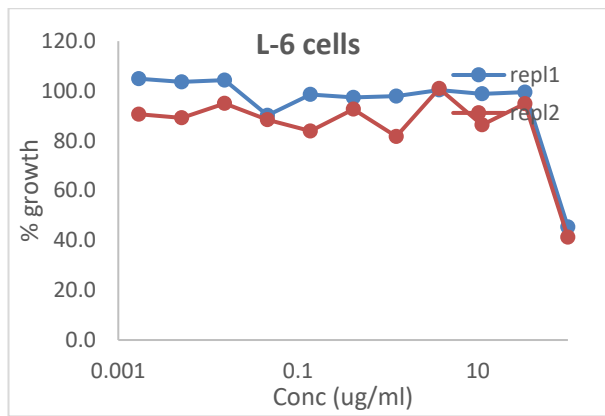

**Figure S38.** Dose-response curves of compound **32** against *P.f.* NF54, *P.f.* K<sub>1</sub> and L-6 cells.

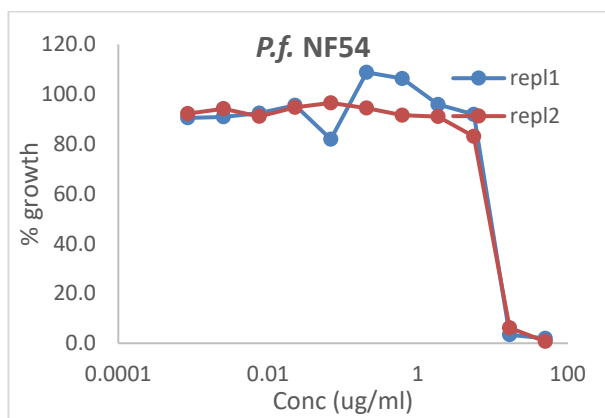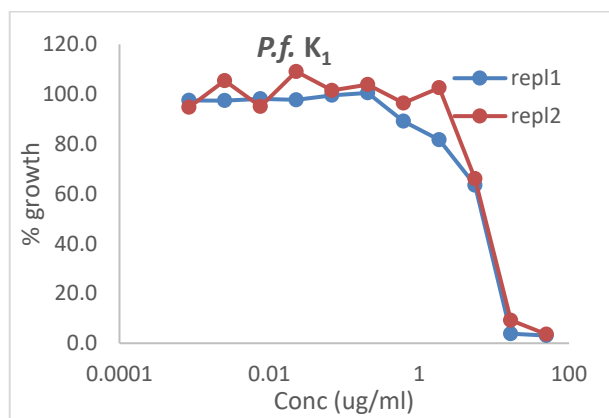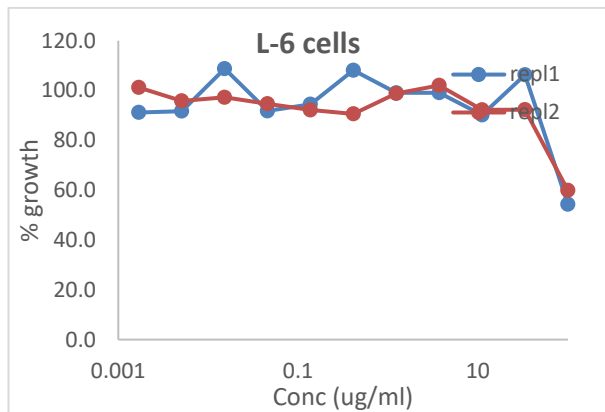



**Figure S39.** Dose-response curves of compound **34** against *P.f.* NF54, *P.f.* K<sub>1</sub> and L-6 cells.

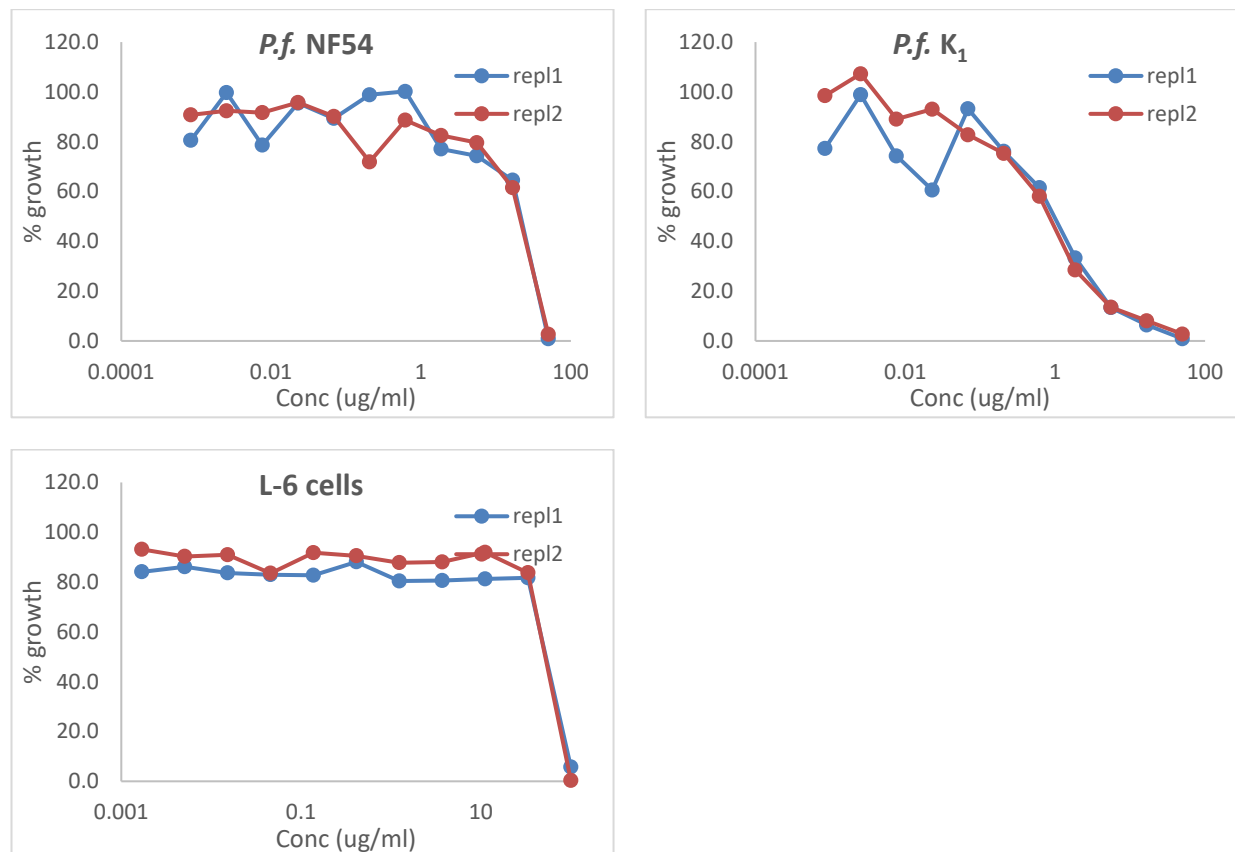

**Figure S40.** Dose-response curves of compound **35** against *P.f.* NF54, *P.f.* K<sub>1</sub> and L-6 cells.

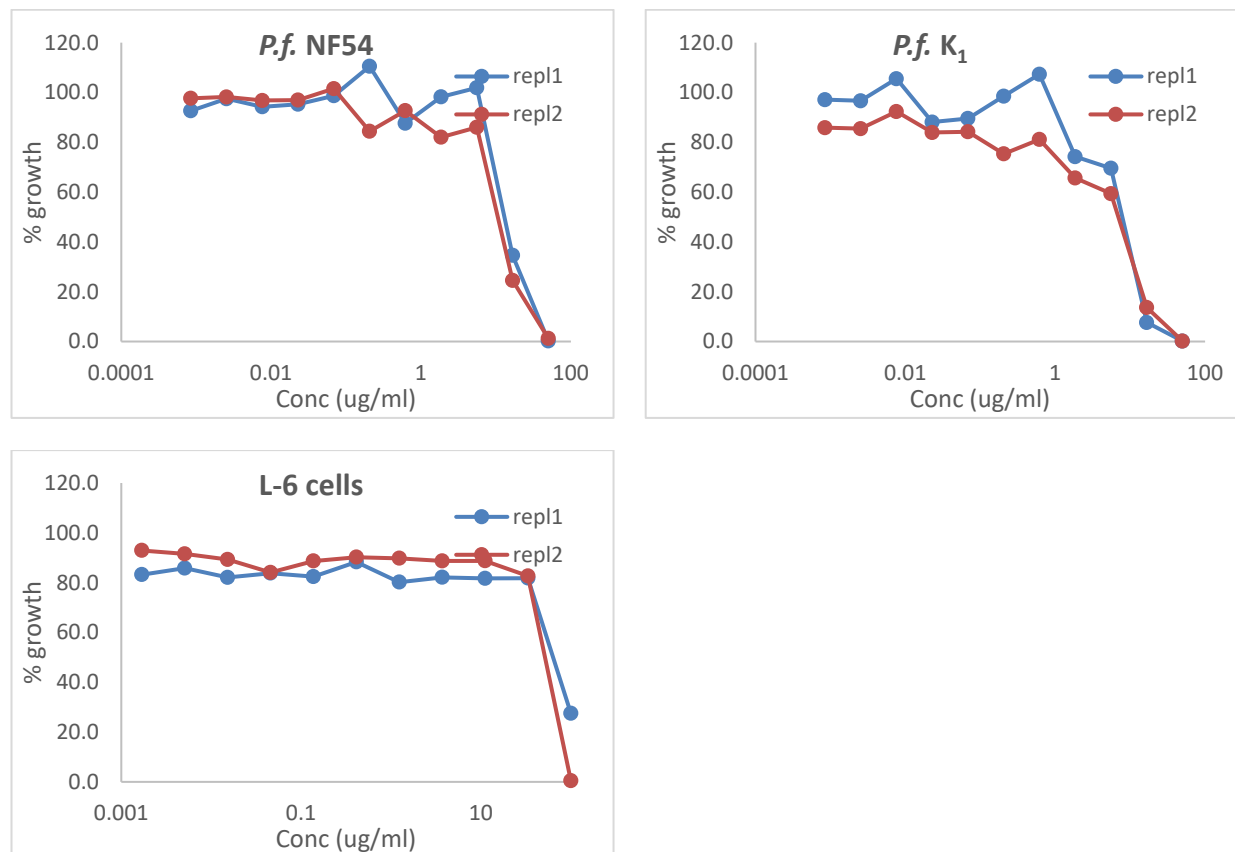

**Figure S41.** Dose-response curves of compound **39** against *P.f.* NF54, *P.f.* K<sub>1</sub> and L-6 cells.

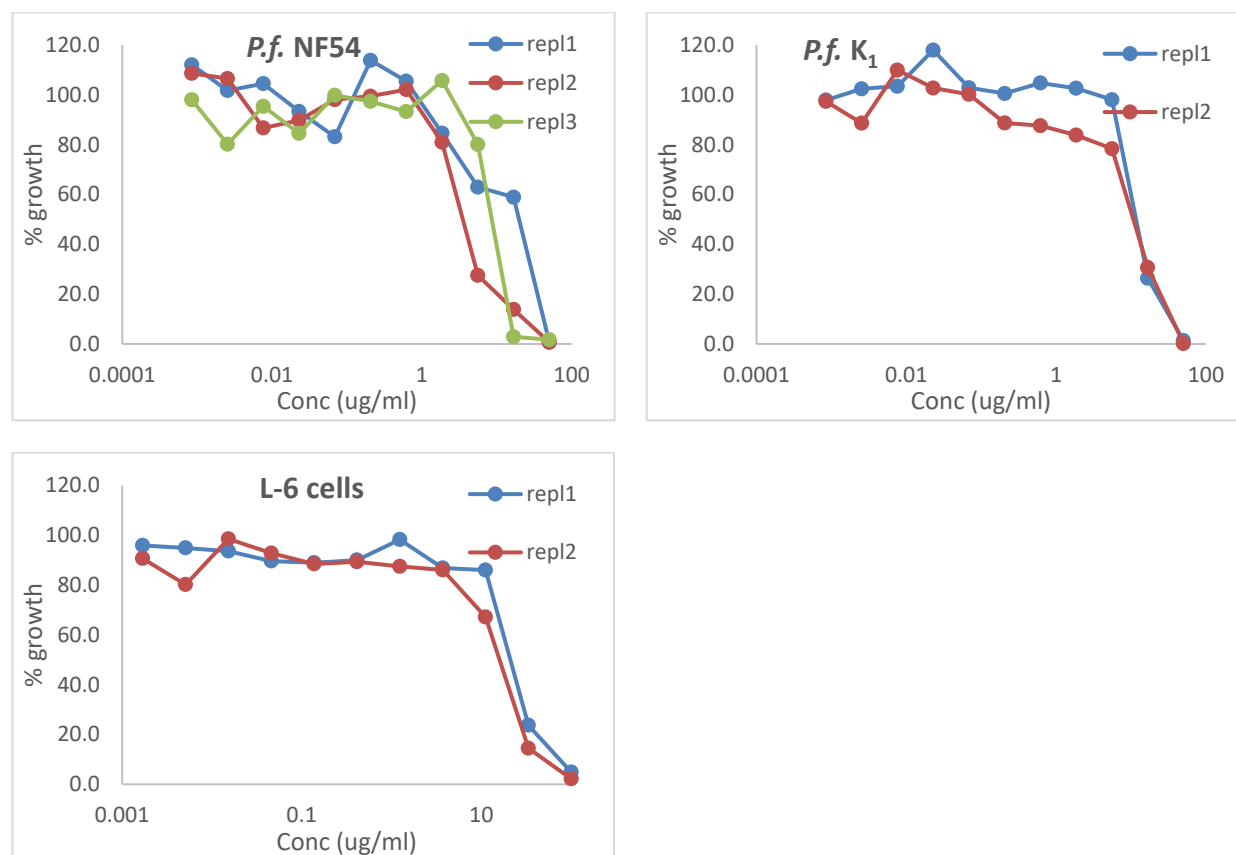

**Table S1.** Activities with standard deviation values of compounds **1**, **10-17**, **26-29**, **31**, **32**, **34**, **35** and **39** against *P.falciparum* NF54, *P.falciparum* K<sub>1</sub> and L-6 cells, expressed as IC<sub>50</sub> ( μM).<sup>a</sup>

| Compound   | <i>P.f.</i> NF54 <sup>b</sup> | <i>P.f.</i> K <sub>1</sub> <sup>c</sup> | Cytotoxicity<br>L-6 cells |
|------------|-------------------------------|-----------------------------------------|---------------------------|
| <b>1</b>   | 0.011 ± 0.001                 | 0.011 ± 0.0068                          | 159.3 ± 3.36              |
| <b>10</b>  | 0.076 ± 0.021                 | 0.091 ± 0.015                           | 111.2 ± 12.9              |
| <b>11</b>  | 0.343 ± 0.001                 |                                         | 14.92 ± 1.05              |
| <b>12</b>  | 0.831 ± 0.011                 |                                         | 14.24 ± 3.45              |
| <b>13</b>  | 0.019 ± 0.010                 | 0.007 ± 0.00                            | 9.97 ± 3.36               |
| <b>14</b>  | 0.049 ± 0.035                 | 0.108 ± 0.025                           | 41.09 ± 9.96              |
| <b>15</b>  | 0.098 ± 0.002                 |                                         | 13.99 ± 3.97              |
| <b>16</b>  | 0.014 ± 0.003                 |                                         | 20.03 ± 5.67              |
| <b>17</b>  | 0.167 ± 0.068                 |                                         | 35.03 ± 12.7              |
| <b>26</b>  | 4.055 ± 1.78                  | 1.87 ± 0.210                            | 101.7 ± 2.41              |
| <b>27</b>  | 0.674 ± 0.015                 | 0.586 ± 0.020                           | 116.4 ± 4.35              |
| <b>28</b>  | 0.192 ± 0.020                 |                                         | 77.23 ± 4.46              |
| <b>29</b>  | 0.712 ± 0.013                 |                                         | 104.0 ± 11.4              |
| <b>31</b>  | 7.24 ± 0.068                  | 5.02 ± 2.03                             | 242.3 ± 10.3              |
| <b>32</b>  | 24.25 ± 0.575                 | 19.53 ± 0.610                           | 265.7 ± 0.00              |
| <b>34</b>  | 56.01 ± 0.821                 | 2.41 ± 0.179                            | 139.8 ± 0.995             |
| <b>35</b>  | 30.15 ± 3.05                  | 18.99 ± 1.15                            | 147.3 ± 15.1              |
| <b>39</b>  | 21.52 ± 8.99                  | 39.92 ± 1.64                            | 65.95 ± 9.06              |
| <b>ART</b> |                               | 0.0064                                  | 450.5                     |
| <b>CQ</b>  |                               | 0.15                                    | 188.5                     |
| <b>POD</b> |                               |                                         | 0.012                     |

ART = artemisinin; CQ = chloroquine; POD = podophyllotoxin

<sup>a</sup> Values represent the average of four determinations (two determinations of two independent experiments)

<sup>b</sup> Sensitive to chloroquine

<sup>c</sup> Resistant to chloroquine and pyrimethamine.
